# 1 **Age-related decline in cortical inhibitory tone strengthens** 2 **motor memory**

3 Pierre Petitet<sup>1,\*;†</sup>, Gershon Spitz<sup>1,2;†</sup>, Heidi Johansen-Berg<sup>1</sup> & Jacinta O’Shea<sup>1,3,\*</sup>

4 <sup>1</sup>*Wellcome Centre for Integrative Neuroimaging, FMRIB Centre, Nuffield Department of Clinical*  
5 *Neurosciences, Oxford, United Kingdom*

6 <sup>2</sup>*Turner Institute for Brain and Mental Health, Monash University, Melbourne, Australia*

7 <sup>3</sup>*Wellcome Centre for Integrative Neuroimaging, Oxford Centre for Human Brain Activity*  
8 *(OHBA), University of Oxford Department of Psychiatry, Warneford Hospital, Warneford Lane,*  
9 *Oxford, United Kingdom*

10 † *Contributed equally to this work.*

11 \* *Corresponding authors: pierre.petitet@gmail.com; jacinta.oshea@psych.ox.ac.uk*

12 **Ageing causes a natural decline in cortical inhibitory tone and associated functional decre-**  
13 **ments. However, in young adults, experimentally lowering cortical inhibition during adapta-**  
14 **tion enhances retention. Here we tested the hypothesis that as sensorimotor cortex inhibitory**  
15 **tone decreases naturally with age, adaptation memory would increase. As predicted, older**  
16 **age was associated with lower  $\gamma$ -amino butyric acid (GABA), the inhibitory neurotransmit-**  
17 **ter, and stronger adaptation memory. Mediation analyses confirmed that the former ex-**  
18 **plained the latter. To probe causality, brain stimulation was used to further lower sensori-**  
19 **motor cortical inhibitory tone during adaptation. Across individuals, stimulation enhanced**  
20 **or impaired memory, as a function of sensorimotor cortical excitation:inhibition ratio (E:I**

1 = Glutamate:GABA). Stimulation increased retention in individuals with low E:I, but dis-  
2 rupted it in those with high E:I. Thus, we identify a form of memory that improves naturally  
3 with age, depends causally on sensorimotor neurochemistry, and may be a potent target for  
4 neurorehabilitation.

## 5 Introduction

6 Motor capacities decline with age<sup>1,2</sup>. As the brain and body become older, movements lose  
7 speed<sup>3,4</sup>, strength<sup>5</sup> and coordination<sup>6</sup>. This natural loss of function is exacerbated by motor disor-  
8 ders which rise sharply with age (e.g., stroke, sarcopenia, Parkinsonism). As the elderly population  
9 increases<sup>7</sup>, there is a need for strategies to counteract and compensate for age-related motor de-  
10 cline.

11 During ageing, the motor system must adapt continuously to ongoing neuro-musculo-skeletal  
12 change. Brain plasticity enables this. Plasticity is essential to learn new motor skills, adapt and  
13 retain existing ones, and to rehabilitate functions impaired by disease<sup>8,9</sup>. Thus plasticity plays an  
14 important role in mitigating age-related motor decline<sup>10,11</sup>.

15 Unfortunately, plasticity also declines with age<sup>12</sup>, especially in the motor domain<sup>13-15</sup>. A  
16 major cause is the dysregulation of the finely tuned balance between cortical excitation and in-  
17 hibition (E:I)<sup>10</sup>. Across cortex, E:I is disrupted because  $\gamma$ -aminobutyric acid (GABA), the major  
18 inhibitory neurotransmitter, declines with age, both in animals<sup>16,17</sup> and humans<sup>15,18-26</sup>. Regional  
19 decline of cortical GABA causes a loss of inhibitory tone, and this is associated with decrements in

1 functions localized to the affected regions<sup>27–29</sup>. For example, in somatosensory cortex higher E:I is  
2 associated with poorer tactile discrimination, both in young and old adults<sup>20,30</sup>. In primary motor  
3 cortex (M1), age-related decline of inhibitory tone is associated with poorer upper-limb dexterity<sup>23</sup>,  
4 postural imbalance<sup>31,32</sup>, and impaired ability to suppress automatic responses<sup>26</sup>.

5 By contrast, here we tested the hypothesis that, as M1 GABA declines with age, a specific  
6 form of upper limb functional plasticity would *increase*: adaptation memory. Across the lifespan,  
7 adaptation is that property of the motor system that enables individuals to compensate for perturba-  
8 tions by adjusting their movements to maintain motor success<sup>33,34</sup>. After a perturbation is removed,  
9 adaptation memory is expressed as an *after-effect* – a movement bias in the opposite direction. The  
10 strength of adaptation memory is indexed by the persistence of the after-effect. There is a wealth  
11 of evidence that adaptation is preserved (or somewhat impaired) in healthy ageing<sup>35–45</sup>. In our  
12 previous work, in young adults, we showed that experimentally lowering M1 inhibitory tone dur-  
13 ing adaptation increases persistence of the after-effect<sup>46–48</sup>. Here, we reasoned that if after-effect  
14 retention depends *causally* on M1 inhibitory tone, then owing to age-related M1 GABA decline,  
15 this form of memory would *increase naturally with age*.

16 This hypothesis was confirmed in a cross-sectional study of thirty-two healthy older adults  
17 (mean age: 67.46 years, *s.d.*: 8.07). Using magnetic resonance spectroscopy to quantify neuro-  
18 chemistry, we showed that M1 GABA declines with age. Using prism adaptation<sup>49</sup>, we showed  
19 that retention increases with age. A mediation analysis subsequently confirmed that as GABA de-  
20 clines with age, memory increases, and the former explains the latter. To demonstrate causality,

1 we intervened experimentally with excitatory anodal transcranial direct current stimulation - to try  
2 and further lower M1 GABA<sup>50,51</sup> and thus further increase memory. On average, stimulation did  
3 not increase memory. Rather, a moderation analysis showed that how stimulation changed mem-  
4 ory depended on individuals' motor cortical E:I. In individuals with low E:I, stimulation increased  
5 retention; in individuals with high E:I, stimulation decreased retention.

6 Thus we identify a specific domain of motor functional plasticity that improves with age, as  
7 a natural consequence of motor cortical inhibitory decline. This memory function can be further  
8 enhanced by neurostimulation, but only in individuals least affected by age-related dysregulation of  
9 motor cortical E:I. These findings challenge the prevailing view of ageing as inevitable functional  
10 decline. Whereas learning of new motor skills may decline, the capacity to maintain adaptation  
11 of existing skills improves naturally with age. That adaptation memory is enhanced naturally with  
12 age indicates it may have untapped potential as a target for training strategies that aim to preserve,  
13 improve or restore motor function in healthy or pathological ageing<sup>47</sup>.

## 14 **Results**

15 **Retention increases with age.** First we tested the prediction that adaptation memory increases  
16 with age. We used a cross-sectional correlational design to measure the continuous effect of ageing  
17 across a mid- to late- life sample. This avoids the confounds inherent in a between-groups “young  
18 vs. old” design caused by gross differences in body, brain and behaviour. In Experiment 1 thirty  
19 two healthy male volunteers aged between 49 and 81 (mean age: 67.46 years, *s.d.*: 8.07; Table

1 S1) performed a session of prism adaptation (PA) with their dominant right hand. Only men were  
2 recruited to avoid potential confounds from cyclical variability in neurotransmitter concentration  
3 with the menstrual cycle in women<sup>52,53</sup> (see *Methods*).

4 The behavioural protocol was similar to previous work from our laboratory<sup>47,54</sup> (full details  
5 in *Methods*). All pointing error data were normalised by baseline (pre-adaptation) accuracy. Fol-  
6 lowing adaptation, retention of the after-effect was assessed after a short (10 minutes) and long  
7 (24 hours) interval (Fig. S1). Effects were analysed statistically using linear mixed-effect models  
8 (LMMs) with maximal random structure. This allowed us to assess both the average lateral error  
9 across task blocks and the stability of the error within blocks, while controlling for random effects  
10 of inter-individual variation.

11 Fig.1a shows the pointing error data, plotted as changes from baseline accuracy. Throughout  
12 adaptation, participants made rapid pointing movements at a 10° left and right target, while wear-  
13 ing prism glasses that displaced their visual field 10° to the right. During prism exposure (Blocks  
14 E1-6) participants gradually corrected their errors. The learning and forgetting dynamics are visi-  
15 ble within and across blocks. At prism onset participants exhibited a large rightward error (Fig.1a;  
16 Block E1, trial 1: mean 7.77°, s.e.m.: 1.05°,  $t_{(31)} = 7.43$ ,  $p < 0.001$ ) which was corrected grad-  
17 ually across trials and blocks (E1-6) until performance stabilized (E6) close to restored baseline  
18 accuracy (main effect of Trial within Block:  $t_{(3185)} = -9.34$ ,  $p < 0.001$ ; main effect of Block:  
19  $t_{(3185)} = -9.07$ ,  $p < 0.001$ ; Table S2 - model 1).

20 As participants adapted gradually to the rightward visual shift, a consequent leftward after

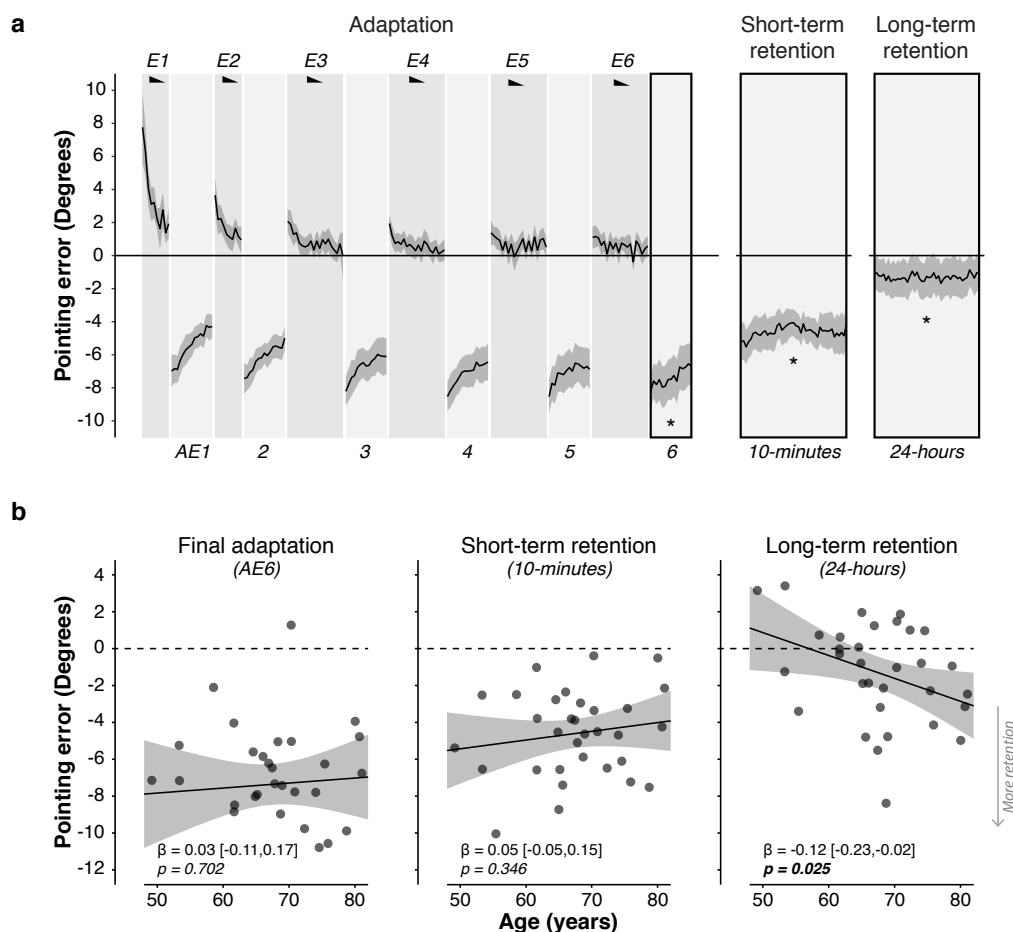

**Figure 1: Long-term retention of prism adaptation is higher in older adults.** **a.** Group mean pointing errors ( $\pm 1$  s.e.m.) expressed as change from baseline accuracy ( $y=0$ ). Positive y-axis values are rightward errors, negative leftward. Black wedges indicate blocks in which prisms were worn. During right-shifting prism exposure (E1-6), visual feedback enabled participants to correct their rightward pointing errors across trials. Consequent leftward after-effects were measured in intervening blocks without visual feedback throughout adaptation (AE1-6). After-effect retention was measured post-adaptation after a short (10 minutes) and long (24 hours) interval. There was significant retention at both time points. **b.** Age had no effect on the after-effect magnitude acquired by the end of adaptation (block AE6), nor on short-term retention (10 minutes). The key finding was that older adults showed significantly greater long-term retention (24-hours). Full statistics are in Tables S2 & S3.

1 effect developed, measured in interleaved blocks, critically without prisms and without visual feed-  
2 back (Fig. 1a; Blocks AE1-6; mean normalised error:  $-6.66^\circ$ ,  $t_{(2865)} = -16.94$ ,  $p < 0.001$ ; Table  
3 S2 - model 2). This prism after-effect (AE) is the key experimental measure. On AE trials, the ab-  
4 sence of visual feedback prevents error-based learning and requires participants to rely on internal  
5 representations of sensed limb position to guide their movements. Thus, the leftward AE expresses  
6 the visuomotor transformation acquired during prism exposure. Its persistence after prism removal  
7 is the measure of adaptation memory. The AE was measured after each block of prism exposure  
8 (AE1-6, Fig. S1). Initially memory was labile: on the first trial of the first block the AE was large  
9 ( $-6.99^\circ$ ), but across the 15 trials of the first block it decayed by  $2.70^\circ$  on average. Subsequent  
10 blocks of prism exposure led the AE to gradually stabilize, evidenced by the progressive flattening  
11 of slopes across blocks AE1-6 (interaction Trial  $\times$  Block:  $t_{(2865)} = -3.33$ ,  $p = 0.001$ ; Fig. 1a;  
12 Table S2 - model 2). Thus, our protocol induced an adaptation memory trace that consolidated  
13 gradually across the Adaptation phase.

14 The critical measure of memory was AE retention post-adaptation (Fig. 1a-b). After 10  
15 minutes of blindfolded rest there was significant short-term retention (mean error:  $-4.61^\circ$ , s.e.m.:  
16  $0.41^\circ$ ,  $t_{(1434)} = -11.36$ ,  $p < 0.001$ ; Table S2 - model 3). Long-term retention, measured 24 hours  
17 later, was also significant (mean error:  $-1.30^\circ$ , s.e.m.:  $0.48^\circ$ ,  $t_{(1434)} = -2.75$ ,  $p = 0.006$ ; Table  
18 S2 - model 4). The AE was stable at both time points, indicated by no change in error across trials  
19 (main effect of Trial: both  $p > 0.38$ ).

20 Our hypothesis was that AE retention would increase with age. Fig. 1b plots the results.

1 Age had no effect on the AE magnitude acquired by the end of prism exposure (Block AE6), nor  
2 on short-term retention (both  $p > 0.35$ ; Fig. 1b; Table S3 - models 1 & 2). However, older age  
3 was associated with greater long-term retention (Age  $\times$  AE<sub>24hrs</sub>:  $t_{(1432)} = -2.24$ ,  $p = 0.025$ ,  
4 Fig. 1b, Table S3 - model 3). This is the key finding. This association remained significant when  
5 controlling for the AE at the two preceding time points (AE6 and 10-min retention), and when  
6 controlling for average reaching speed during prism exposure (slower movements, expected in  
7 ageing, could arguably favour retention; Table S3 - models 4-6).

8 **Motor cortical inhibitory tone declines with age.** Next we tested for an expected decrease in  
9 motor cortical inhibitory tone with age. Three Tesla magnetic resonance spectroscopy was used to  
10 quantify neurochemical concentration in left sensorimotor cortex (labelled “M1”), and in a control  
11 region of occipital cortex (labelled “V1”; see *Methods*; Fig. S2). The metabolites of interest were  
12 GABA and Glutamix (“Glx”= Glutamate + Glutamine, since these two metabolites cannot be re-  
13 liably distinguished at 3 Tesla). As expected, in both regions, age was associated with significant  
14 grey matter atrophy (both  $p < 0.002$ ), which could indirectly lower neurochemical concentration  
15 estimates. Hence, all analyses of neurochemistry ruled out this potential confound by controlling  
16 for grey and white matter fractions within each region (see *Methods*). To minimize multiple com-  
17 parisons, analyses focused on the ratio of excitation:inhibition (E:I = Glx:GABA). If an effect was  
18 significant, follow-up analyses assessed the individual contributions of Glx and GABA.

19 Figure 2 shows the results. Multiple linear regressions showed that sensorimotor cortex E:I  
20 increased with age (standardised  $\beta_{age} = 0.66$ ,  $t_{(18)} = 2.09$ ,  $p = 0.051$ ; Table S4 - model 1). As



1 predicted, across individuals, as age increased, M1 GABA concentration decreased (standardised  
2  $\beta_{age} = -0.74$ ,  $t_{(17)} = -2.48$ ,  $p = 0.024$ ; Table S4 - model 2). There was no such relationship  
3 with Glx (standardised  $\beta_{age} = -0.23$ ,  $t_{(17)} = -0.68$ ,  $p = 0.51$ ; Fig. 2a, Table S4 - model 3).

4 In the anatomical control region (occipital cortex), there was a qualitatively similar pattern  
5 of age-related inhibitory decline, consistent with previous reports<sup>55,56</sup>. However this was not  
6 statistically significant, likely reflecting the impact of quality controls that reduced the size of the  
7 occipital dataset and consequently reduced power (Table S1). There was no significant relationship  
8 between neurochemistry and age in V1, not for E:I (standardised  $\beta_{age} = 0.39$ ,  $t_{(12)} = 1.46$ ,  
9  $p = 0.171$ ), GABA (standardised  $\beta_{age} = -0.40$ ,  $t_{(11)} = -1.57$ ,  $p = 0.145$ ) or Glx (standardised  
10  $\beta_{age} = 0.04$ ,  $t_{(11)} = .22$ ,  $p = 0.832$ ; ; Table S4 - models 4-6).

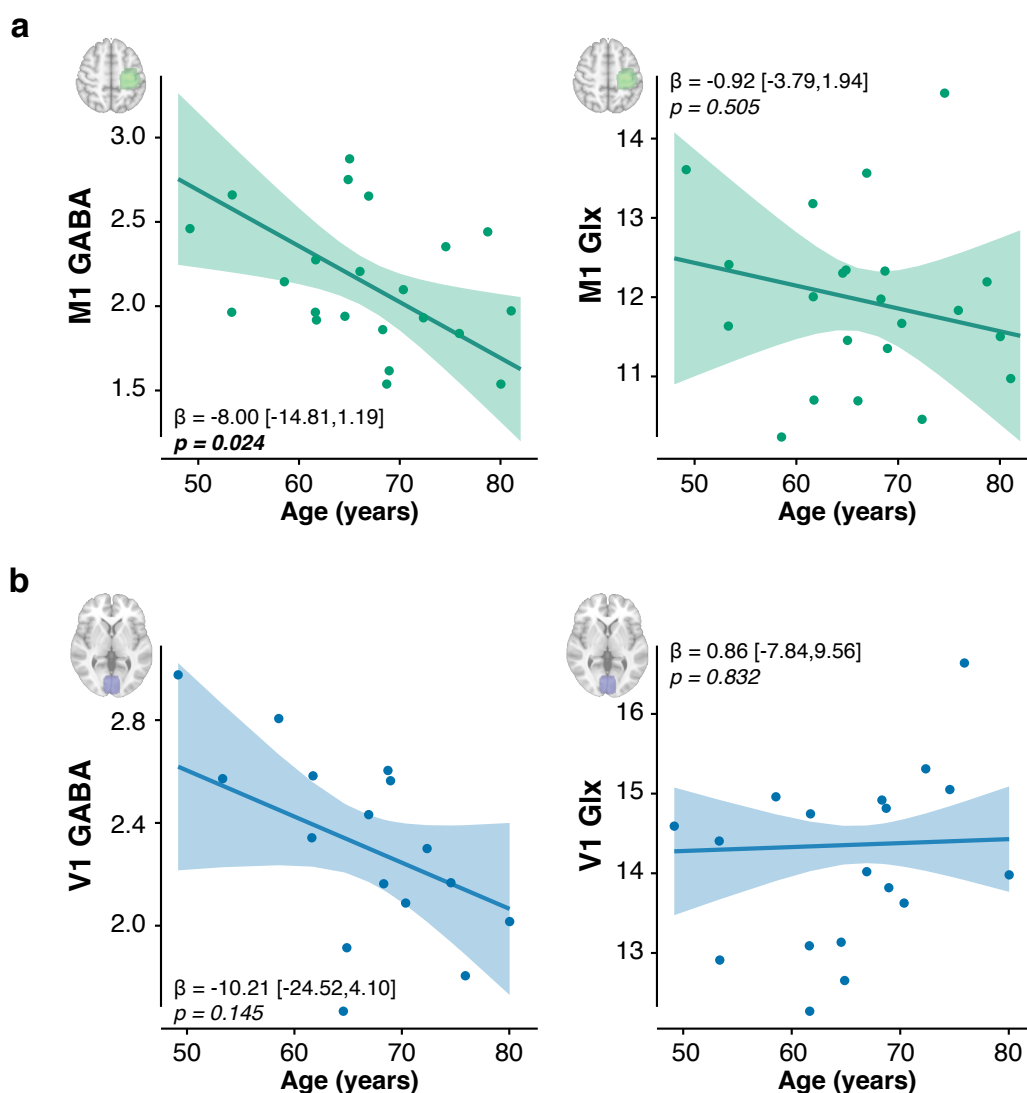

Figure 2: **Motor cortical inhibitory tone is lower in older adults.** **a.** The concentration of GABA but not Glutamix (Glutamate + Glutamine, Glx) was negatively associated with age in the left sensorimotor cortex (labelled “M1”). **b.** There was no significant association between age and neurochemical concentration in occipital cortex (labelled “V1”). For each voxel and neurotransmitter, relationships control for the fraction of grey matter and white matter, and the other neurotransmitter. Absolute concentrations are expressed in arbitrary units. Full statistical details are in Table S4.

1

2 **Lower motor cortical inhibitory tone is associated with greater long-term retention.** Based  
3 on our previous work<sup>47,48</sup>, we hypothesized that lower motor cortical inhibitory tone would be  
4 associated with greater retention. Results confirmed this prediction (Fig. 3). Across individuals,  
5 higher sensorimotor cortex E:I was associated with a larger prism AE at retention 24-hours after  
6 adaptation ( $t_{(980)} = -5.40$ ,  $p < 0.001$ ; Table S5 - model 1). This relationship was driven by  
7 GABA: individuals with lower M1 GABA concentration showed greater retention ( $t_{(978)} = 5.04$ ,  
8  $p < 0.001$ ; Fig. 3a, Table S5 - model 2). There was no such relationship with M1 Glx ( $t_{(978)} =$   
9  $0.01$ ,  $p = 0.99$ ; Fig. 3a, Table S5 - model 2). Thus, this memory effect was neurochemically  
10 specific (M1 GABA vs. M1 Glx:  $z = 3.56$ ,  $p < 0.001$ ). It was also anatomically specific (M1  
11 GABA vs. V1 GABA:  $z = 2.80$ ,  $p = 0.005$ ): there was no relationship between retention and V1  
12 metabolites - not for GABA, Glx or EI (all  $p > 0.25$ ; Fig. 3b, Table S5 - models 5 & 6). As before,  
13 the results were unchanged when controlling for average movement time during prism exposure  
14 (S5 - models 3, 4, 7, 8).

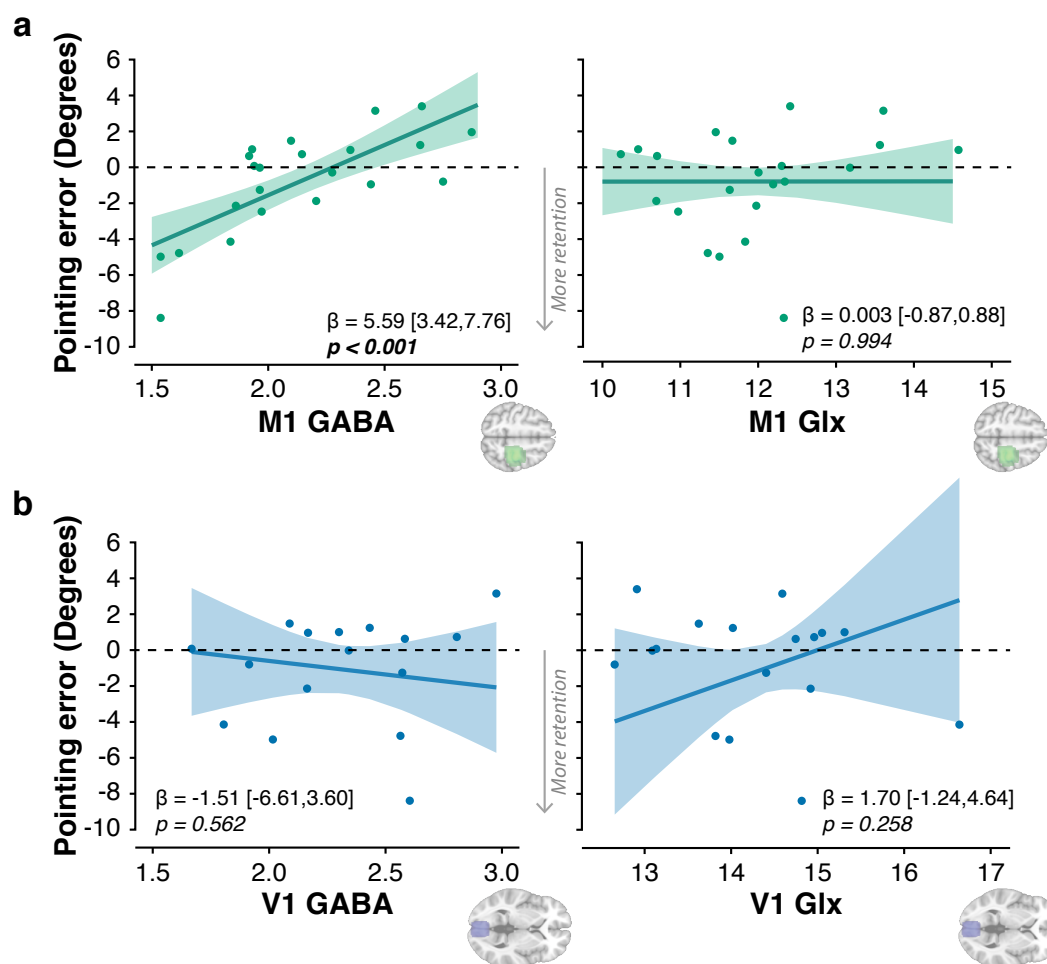

Figure 3: **Lower motor cortical inhibitory tone is associated with greater long-term retention.** Plot shows relationships between brain chemistry and the magnitude of prism after-effect retained 24 hours after adaptation. Negative values on the y-axis indicate retention. **a. Sensorimotor cortex ("M1")** Across individuals, lower GABA was associated with greater retention. There was no relationship with Glx (Glutamate + Glutamine). **b. Occipital cortex ("V1")** There was no relationship between GABA or Glx and 24-hour retention. For each voxel and neurotransmitter, relationships control for the fraction of grey matter and white matter, and the other neurotransmitter. Absolute concentrations are expressed in arbitrary units. Full statistics details are in Table S5.

1

2 **Retention increases with age because motor cortical GABA concentration declines.** Our key  
3 prediction was that as M1 GABA concentration declines with age, adaptation memory would in-  
4 crease, and the former would explain the latter. We used mediation analysis to formally test this  
5 hypothesis. Mediation analysis is well suited to a situation in which the independent variable (Age)  
6 may not directly influence the dependent variable (Long-term retention), but is instead hypothe-  
7 sized to do so indirectly via its influence on candidate mediators (M1 E:I, GABA, Glx). The extent  
8 to which the relationship between the independent and dependent variable is influenced by a me-  
9 diator is termed the indirect effect. We tested the significance of indirect effects using a bootstrap  
10 estimation approach with 10,000 samples (see *Methods*).

11 Figure 4 shows that, as hypothesized, the effect of age on long-term retention was mediated  
12 by motor cortical E:I ( $ab_1 = -0.41$ , 95%CI:  $[-1.45, -0.08]$ ,  $p = 0.017$ ). More specifically,  
13 the indirect effect was driven by M1 GABA and not Glx. M1 GABA was a significant mediator  
14 ( $ab_1 = -0.50$ , 95%CI:  $[-1.46, -0.16]$ ,  $p = 0.0086$ ), accounting for 64% of the variance between  
15 age and long-term retention (Fig. 4, Table S6), while M1 Glx showed no such effect ( $ab_2 = 0.018$ ,  
16 95%CI:  $[-0.095, 0.31]$ ,  $p = 0.74$ ). When M1 neurochemistry was controlled for, age was no  
17 longer a significant predictor of 24-hour retention ( $c' = -0.28$ ,  $p = 0.38$ ), consistent with full  
18 mediation. Thus, age-related decline in sensorimotor GABA explains why adaptation memory  
19 increases with age. Once again, results were unchanged when controlling for average movement  
20 time during prism exposure (Table S7).

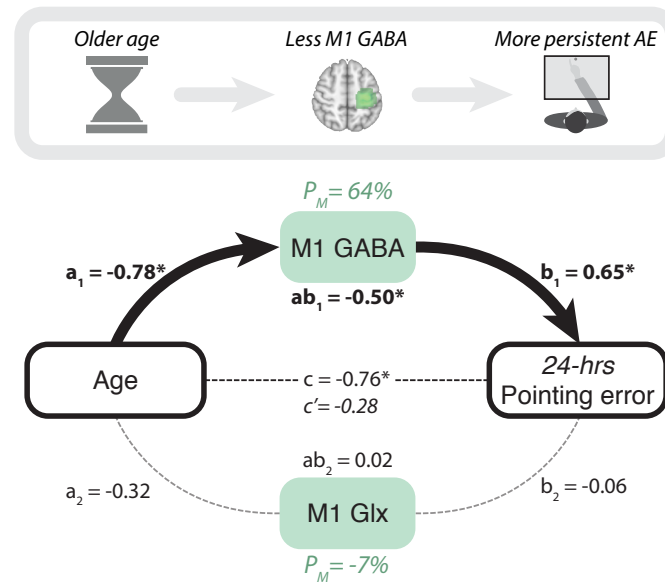

Figure 4: **Adaptation memory increases with age because motor cortical inhibitory tone declines.** A mediation model tested whether M1 neurochemistry explained the relationship between age and retention. Consistent with our mechanistic hypothesis, GABA, but not Glx, mediated the positive relationship between age and 24-hour retention, explaining 64% of the variance. Standardised regression coefficients are reported next to the corresponding paths. Asterisks indicate significance ( $p < 0.05$ ). Full statistics: Table S6. Independent variable: Age. Dependent variable: AE 24-hours post-adaptation. Mediators: M1 GABA and Glx (controlling for grey and white matter tissue fractions).

1 **How stimulation changes memory depends on motor cortical E:I.** The mediation model in-  
2 dicated that the M1 GABA decline caused the memory increase in older adults. However, the  
3 cross-sectional study design precludes direct causal inference<sup>57</sup>. Hence, to more directly test cau-  
4 sation, we intervened experimentally with anodal transcranial direct current stimulation (a-tDCS).  
5 M1 a-tDCS has been shown to increase motor cortical E:I in young<sup>58</sup> and older<sup>51</sup> adults. In addi-  
6 tion, we have previously shown in young adults that M1 a-tDCS during adaptation increases short-  
7 and long- term retention, in proportion to the stimulation-induced increase in E:I<sup>47</sup>.

8       However, given our finding in Experiment 1 that M1 E:I is already naturally high with age  
9 (Fig. 2), we expected M1 a-tDCS (which increases E:I) to be consequently less effective overall in  
10 older adults. Homeostatic mechanisms constrain cortical excitability changes to within physiolog-  
11 ical range. Hence, if E:I is already near ceiling in older adults, this is likely to limit, or even reverse  
12 the direction of, the excitability increase that can be induced experimentally by a-tDCS<sup>59–63</sup>. For  
13 our hypothesis, that retention depends causally on M1 E:I, this predicts an inverted U-shape stimu-  
14 lation effect in older adults: improved memory in individuals with low E:I (who have capacity for  
15 an excitability increase), impaired memory in those with high E:I (who are near ceiling), and little  
16 or no change for those in between (Fig. 6a).

17       To test this hypothesis, a sub-set of twenty-five participants from Experiment 1 (mean age:  
18 69.6 years, *s.d.*: 8.4; Table S1) consented to undergo a follow-up study (Experiment 2), in which  
19 tDCS (anodal/sham, counterbalanced) was applied in two weekly test sessions to left M1 during  
20 adaptation, and retention was assessed after 10 minutes and 24 hours (see *Methods*, Fig. S1).

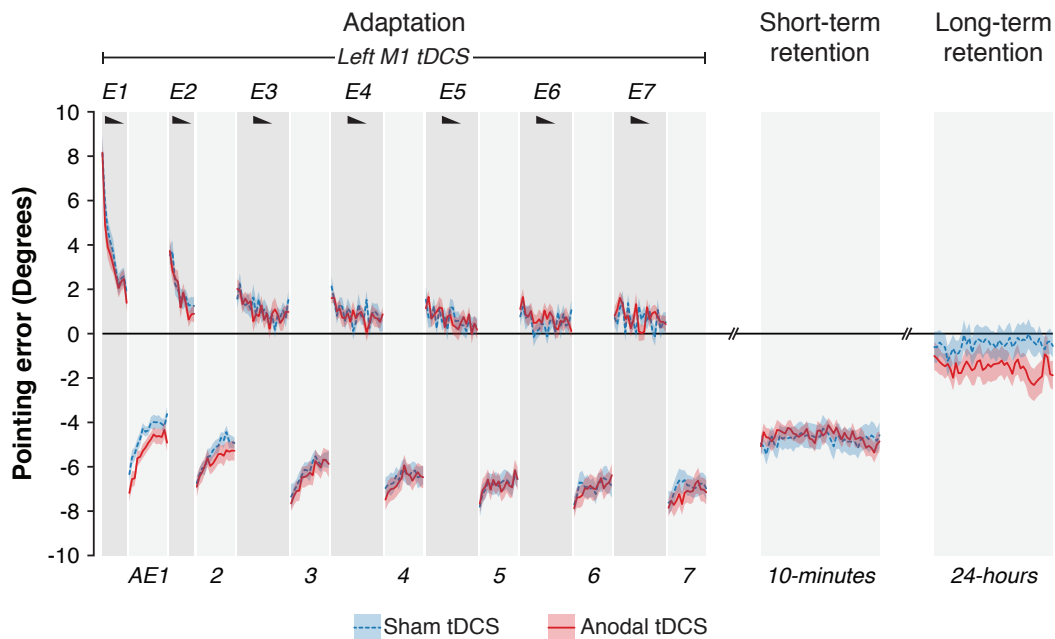

Figure 5: **No increase in retention across older adults with excitatory stimulation of M1 during adaptation.** Timecourse of pointing errors for the same behavioural paradigm and graph conventions as in Figure 1, except that stimulation (anodal or sham tDCS) was applied to left M1 throughout the adaptation phase. Errors are normalised to baseline (pre-adaptation) accuracy. Negative values on the y-axis indicate prism after-effects. Unlike our previous work in young adults, on average, there was no significant increase in retention after excitatory stimulation of M1 during adaptation.



1        Figure 5 shows the results for the group average. Stimulation had no effect on short-term  
2 retention ( $t_{(2235)} = 0.22, p = 0.83$ ; Table S8 - model 1). Although long-term retention increased  
3 numerically, this was not significant ( $t_{(2235)} = -1.35, p = 0.18$ ; Table S8 - model 4). The lack of  
4 a significant memory gain from stimulation across the group contrasts with our previous findings  
5 in young adults<sup>47,48</sup>.

6        To test our key hypothesis, that motor cortical E:I would causally influence the direction of  
7 stimulation-induced memory change, we conducted a moderation analysis. For all participants  
8 who had undergone Experiment 1 ( $n = 17$ , data shown in Fig. 2) we added their M1 Glx:GABA  
9 levels to the linear mixed model analyses of the effect of stimulation on retention. As predicted,  
10 for long-term retention stimulation interacted significantly with motor cortical E:I (E:I  $\times$  a-tDCS:  
11  $t_{(1419)} = 2.40, p = 0.009$ , one-tail; Fig. 6; Table S8 - model 5). Fig. 6 shows how the induced  
12 memory change varied as a function of M1 E:I. In those individuals with low E:I, stimulation  
13 enhanced memory; in individuals with high E:I, stimulation impaired memory. A similar trend  
14 was observed for short-term retention ( $t_{1419} = 1.86, p = 0.064$ , one-tail; Table S8 - model 2).

15        A follow-up LMM assessed the moderating roles of M1 GABA and Glx separately. Both  
16 Glx (Glx  $\times$  a-tDCS:  $t_{(1415)} = 2.57, p = 0.005$ , one-tail) and GABA (GABA  $\times$  a-tDCS:  $t_{(1415)} =$   
17  $-1.73, p = 0.042$ , one-tail) moderated the stimulation effect, each in opposite directions (Table S8  
18 - model 6). Across individuals, stimulation increased retention in those with higher GABA and/or  
19 lower Glx, and impaired retention in those with lower GABA and/or higher Glx. This result was  
20 unchanged when controlling for average movement speed during prism exposure (Table S9), and

1 was not observed within the anatomical control voxel placed over V1 (Table S10).

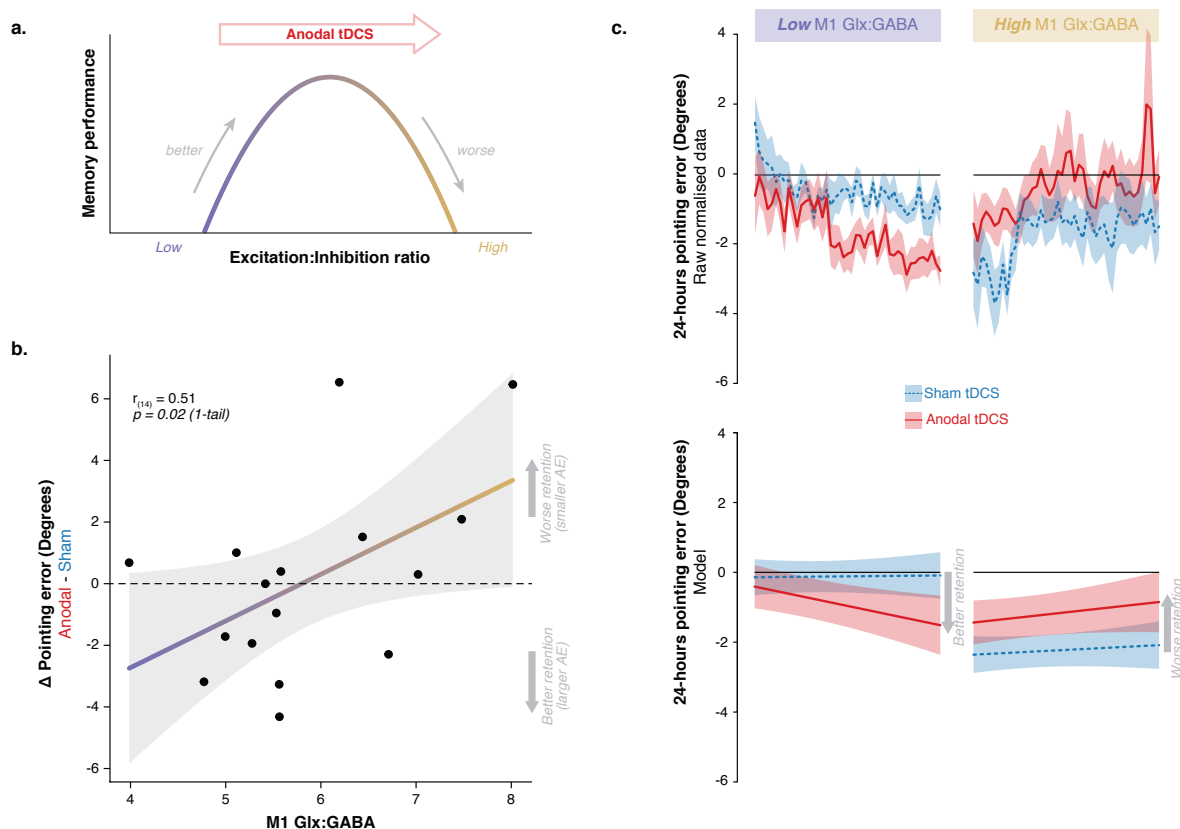

**Figure 6: How stimulation changes memory depends on motor cortical E:I.** Predicted effect of stimulation on memory as a function of motor cortical E:I - enhanced retention in individuals with low E:I and impaired retention in individuals with high E:I. **b.** Results confirmed this hypothesis. Individual M1 E:I (M1 Glx:GABA) is plotted against the stimulation effect (anodal - sham difference in normalised pointing error at 24-hour retention). On the y-axis, negative values indicate greater retention with anodal tDCS compared to sham. Positive values indicate the opposite. Across individuals, stimulation enhanced retention in those with low E:I and impaired it in those with high E:I. **c.** A linear mixed-effect model moderation effect further confirmed that stimulation changed memory as a function of sensorimotor E:I (M1 Glx:GABA  $\times$  tDCS :  $t_{1419} = 2.40$ ,  $p = 0.017$ ). For visualisation purposes, this interaction is illustrated using a median split on the M1 E:I data. The data (top) and model fit (bottom) are plotted separately for individuals with low/high M1 E:I, and show opposing effects of excitatory stimulation on adaptation memory depending on E:I.

## 1 Discussion

2 This study investigated the relationship between sensorimotor cortical GABAergic inhibition and  
3 retention of the prism adaptation after-effect in the ageing brain. In line with our predictions, older  
4 age was associated with reduced tonic GABAergic inhibition within sensorimotor cortex (Fig. 2),  
5 and larger long-term (24-hours) retention of the AE following prism adaptation (Fig. 1). Crucially,  
6 a mediation analysis revealed that the former explained the latter (Figs. 3 & 4). The causal na-  
7 ture of this link was investigated further by manipulating the EIB within sensorimotor cortex<sup>51,58</sup>  
8 using a-tDCS in Experiment 2. At the group level, neurostimulation had no significant influence  
9 on long-term retention (Fig. 5). However, when investigating the determinants of individual re-  
10 sponses, participants with lowest excitation:inhibition ratio were found to benefit the most from  
11 a-tDCS, while those with higher excitation:inhibition showed the opposite. Taken together, our  
12 data provide converging evidence for a role of motor cortical inhibition in the persistence of sen-  
13 sorimotor adaptation in the ageing brain.

14 Previous studies investigating the effect of ageing on sensorimotor adaptation have predomi-  
15 nantly reported an age-related decline in the rate of adaptation<sup>35,37,38,40,41,43,44</sup>. Findings are mixed,  
16 however, with regards to the influence of ageing on the subsequent retention of the acquired visuo-  
17 motor adaptation. Some studies have reported no change<sup>36-39,43,44</sup>, while others have observed  
18 larger after-effects<sup>35,42,45</sup>. In part, these discrepant results can be accounted for by differences in  
19 the adaptation paradigm used (e.g. walking adaptation vs. reaching adaptation) and timescales  
20 considered (within-session vs. between-sessions retention). For example, in the present study,

1 only long-term (24-hours) persistence was enhanced in older participants.

2       Changes in tonic GABAergic signalling in ageing is a well documented phenomenon<sup>15,18–26</sup>.  
3 Typically, the down-regulation of inhibition within sensorimotor regions has been reported to be  
4 detrimental for sensorimotor performance<sup>10,20,23,24,26</sup>. To our knowledge, however, the conse-  
5 quences of reduced GABAergic inhibition on the persistence of sensorimotor adaptation had never  
6 been elucidated. In this study, we provided evidence that, consistent with its role in younger adults,  
7 lower motor cortical GABA is actually beneficial for the maintenance of the newly acquired visuo-  
8 motor map, presumably because it promotes local plasticity<sup>47</sup>. This mechanistic link explained  
9 why older adults showed enhanced long-term adaptation memory. In other words, normal ageing  
10 could be seen as a process similar to M1 anodal transcranial stimulation. That is, ageing is a natural  
11 process that releases inhibition, thus promoting sensorimotor plasticity. This idea of a more plastic  
12 ageing brain might appear at odd with existing theories<sup>12</sup>. However, based on our data alone, it is  
13 difficult to conclude whether this phenomenon is good or bad for real-world function. For example,  
14 it may prove to be maladaptive by inducing a certain rigidity in situations in which perturbations  
15 are volatile and require the agent to quickly learn and forget visuo-motor transformations<sup>64</sup>. A  
16 higher GABAergic tone (in younger adults) might allow for a more selective release of the inhi-  
17 bition blanket<sup>30</sup> and therefore promote retention of motor memories that are the most likely to be  
18 beneficial in the future. Therefore, the degree to which reduced GABAergic tone can be deemed  
19 to be adaptive depends on the specific context and task.

20       The current study relied on magnetic resonance spectroscopy to measure metabolite concen-

1 trations in the living brain. This technique typically suffers from relatively low signal-to-noise  
2 (SNR) ratio, forcing us and others to collect data from a large ( $2 \times 2 \times 2 \text{ cm}^3$ ) region of interest.  
3 By increasing the size of the region-of-interest, however, adjacent regions of somatosensory cortex  
4 were also included in the measure of motor cortical metabolites, therefore reducing regional speci-  
5 ficity. Spatial resolution is a common methodological limitation of MRS studies<sup>30,47,50,51,65,66</sup>.  
6 Similarly, although the transcranial stimulation used in experiment 2 was centered on the motor  
7 cortex this neurostimulation technique is known to operate in a diffuse manner. Moreover, the spa-  
8 tial distribution of the intracranial electric field is known to be shaped by the underlying gyro-sulcal  
9 architecture<sup>67-69</sup>. Although we cannot rule out the contribution of other parts of the sensorimotor  
10 network to our results, the convergence of many studies pointing towards a key role of the motor  
11 cortex in the consolidation of adaptation memory<sup>47,70-77</sup>, suggesting that this region is likely to  
12 play a predominant role.

13 The past two decades have witnessed a growing interest for the use of non-invasive brain  
14 stimulation as an adjuvant to conventional post-stroke neuro-rehabilitation techniques<sup>47,78-81</sup>. This  
15 body of work has highlighted a large inter-individual variability in the response to stimulation<sup>82</sup>,  
16 which is likely to be responsible, at least in part, for the limited translation to a clinical setting.  
17 Better understanding the factors driving this inter-individual variability has therefore become a  
18 priority for the field. Here, we investigated the role of basal GABAergic inhibition in an age  
19 group that more closely match the clinical population likely to benefit from the protocol used in  
20 this study—post-stroke neglect patients<sup>47</sup>. We demonstrated that the basal level of GABAergic in-  
21 hibition in the primary motor cortex was a significant moderator of inter-individual behavioural

1 response to motor-cortical anodal transcranial stimulation. That is older adults with lower basal  
2 inhibition were less likely to show the expected stimulation-induced enhancement of adaptation  
3 memory. This finding has important translational value because it implies that the therapeutic po-  
4 tential of our intervention is constrained by patients' neurochemical profile.

5

6         The moderating influence of basal inhibitory tone raises the idea that the influence of neu-  
7 rostimulation on behaviour may, in part, be dependent on *metaplasticity* – a set of mechanisms  
8 engaged to maintain neural activity within a normal range<sup>60</sup>. Individuals with a higher basal exci-  
9 tation:inhibition ratio (lower basal GABA) are likely to be in a state that is closer to the threshold  
10 at which negative metaplastic feedback mechanisms are engaged. In this particular scenario the  
11 use of an excitatory intervention such as anodal transcranial stimulation could have the paradoxi-  
12 cal effect of initiating metaplastic processes, thus reducing the excitation:inhibition ratio (e.g., by  
13 increasing upregulating GABAergic inhibition). Consistent with this idea, a recent study reported  
14 that the behavioural effect of motor cortical anodal transcranial stimulation could be enhanced in  
15 older adults by pre-conditioning the stimulated cortex with cathodal stimulation, which is hypothe-  
16 sised to increase inhibitory tone<sup>83</sup>. That is, reducing the excitation:inhibition ratio prior to applying  
17 an excitatory stimulation in order to limit the engagement of negative metaplasticity. This provides  
18 a potential solution to the neurochemical constraint identified in by our results. This further sup-  
19 ports a person-centred approach to neurorehabilitation, suggesting that inter-individual differences  
20 in basal neurochemistry may drive response to therapy.

1 **Conclusion.** In the present study, we provided evidence that older age promotes long-term persis-  
2 tence of adaptation after-effects by lowering GABAergic inhibition within the primary motor cor-  
3 tex. In this population, further lowering motor cortical inhibition by means of anodal transcranial  
4 direct stimulation enhanced the memory trace of the adaptation. However, this effect was restricted  
5 in individuals with lower basal GABAergic inhibition, indicating that a person-centred approach to  
6 neurostimulation is required. Taken together, our results are consistent with a maintained involve-  
7 ment of primary motor cortex neurochemistry in the consolidation of adaptation memory that is  
8 responsible for age-related behavioural changes.



## 1 **Materials and Methods**

2 **Participants.** This study was approved by the local ethics committee (Oxford A Research Ethics  
3 Committee; REC reference number: 13/SC/0163), and written informed consent was provided by  
4 all participants. Thirty two right handed men aged between 49 and 81 (mean age: 67.5 years, *s.d.*:  
5 8.1) without any personal or family history of neurological or psychiatric disorder participated in  
6 this study. This study comprised two experiments. In the first experiment ( $n = 32$ ), participants  
7 completed a PA session to measure short (10-minutes) and long-term (24-hours) retention of the  
8 prism adaptation after-effect. A sub-sample of these participants underwent a magnetic resonance  
9 spectroscopy scan to measure neurochemical concentrations in a volume of interest centered on the  
10 left sensorimotor cortex ( $n = 22$ ) and in an anatomical control volume centred bilaterally on mid-  
11 line occipital cortex ( $n = 20$ ; Fig. S2). Exp. 1 was designed to investigate the cross-sectional rela-  
12 tionships between age, neurochemistry, and adaptation memory. In Exp. 2, participants ( $n = 25$ )  
13 completed four behavioural sessions to characterise the effect of left M1 a-tDCS on the persistence  
14 of the prism AE. Details of which measurements were obtained for each individual are in Table  
15 S1.

16 **Prism adaptation protocol.** In both experiments, PA was performed on a purpose-built auto-  
17 mated apparatus (Fig. S1a). The task was programmed in MATLAB version 2014b (MathWorks;  
18 <https://uk.mathworks.com>) using Psychtoolbox<sup>84</sup> version 3, run on a MacBook Pro lap-  
19 top. Participants sat with their head fixed in a chin-rest. They were instructed to perform reaching  
20 movements with their right hand to one of three targets presented on a 32-inch horizontal LCD

1 screen embedded in a table in front of them. There were two lateral targets situated either 10 cm  
2 to the left or right of a central target. The distance between participants' eyes and the central target  
3 was approximately 57 cm. In both experiments, retention of the prism AE was measure after 10  
4 minutes (day 1) and 24 hours (day 2; Fig. S1).

5 The PA procedure comprised two trial types: closed-loop pointing (CLP) and open-loop  
6 pointing (OLP). On closed-loop trials, participants made rapid reaching movements (mean dura-  
7 tion: 452 ms, *s.d.*: 119 ms) with their right index finger to either the left or right target in a pseudo-  
8 randomised order. Participants were instructed to be as accurate as possible whilst maintaining a  
9 “ballistic” hand movement throughout the entire trial. Similar to previous experiments<sup>47,54,85</sup>, vi-  
10 sual feedback was limited to the last two-thirds of the reaching movement in order to limit strategic  
11 adjustments and “in-flight” error correction<sup>86,87</sup>. Because movement speed during prism exposure  
12 is known to influence adaptation<sup>88</sup>, all analyses of inter-individual differences in PA performance  
13 were also run while controlling for CLP duration (averaged across all trials for a participant). On  
14 open-loop trials, participants pointed at a comfortable speed (mean duration: 799 ms, *s.d.*: 135  
15 ms) to the central target. Open-loop instructions emphasised pointing accuracy rather than speed.  
16 The target location was occluded by an opaque shutter screen upon initiation of the reaching move-  
17 ment, thereby requiring participants to rely on proprioception alone to guide their movement. Thus  
18 participants received no visual feedback of the reaching movement, terminal error, or return move-  
19 ment on this type of trial. This procedure enabled measurement of the AE due to lack of visual  
20 feedback, which ensured participants would not de-adapt.

1 During PA sessions, participants initially performed closed-loop and open-loop pointing to  
2 measure their baseline accuracy on these two trial types. The adaptation phase consisted of six  
3 (Experiment 1) or seven (Experiment 2) blocks of prism exposure, alternating closed- and open-  
4 loop pointing trials (Fig. S1). Real or sham neurostimulation was applied throughout this phase in  
5 experiment 2. Persistence of the AE was then probed 10-minutes and 24-hours after completion  
6 of the PA protocol. All participants underwent Exp.1 first, which served as a “familiarisation”  
7 session. In Exp. 2, the order of the two sessions (anodal/sham stimulation) was counter-balanced  
8 across participants.

9 **MRI acquisition protocol.** MR data were acquired on a 3T Siemens Trio. High resolution T1-  
10 weighted structural MR images ( $224 \times 1$  mm axial slices; TR/TE = 3000/4.71 ms; flip angle = 8  
11 deg; FOV = 256; voxel size = 1 mm isotropic; scan time = 8 minutes 48 seconds) were acquired  
12 for magnetic resonance spectroscopy (MRS) voxel placement and registration purposes. MRS data  
13 were acquired from two volumes of interest in two consecutive acquisitions. The first volume-of-  
14 interest was centred on the left motor knob<sup>89</sup> and included parts of the pre- and post- central gyrus  
15 (Fig. S2a). The second (anatomical control) volume-of-interest was centred bilaterally on the  
16 calcarine sulcus in the occipital lobe (visual cortex)<sup>65,66,90</sup> (Fig. S2c). B0 shimming was performed  
17 using a GRE-SHIM ( $64 \times 4.2$  mm axial slices, TR = 862.56 ms, TE1/2 = 4.80/9.60 ms, flip angle  
18 = 12 deg, FOV = 400, scan duration = 63 secs). MR spectroscopy data were acquired using the  
19 semi-LASER sequence (TR/TE = 4000/50 ms, 64 scan averages, scan time = 264 secs)<sup>91,92</sup>.

1 **Transcranial direct current stimulation.** In Exp. 2, stimulation was delivered by a battery driven  
2 DC stimulator (Neuroconn GmbH, Ilmenau, Germany) connected to two  $7 \times 5$  cm sponge elec-  
3 trodes soaked in a 0.9% saline solution. The protocol was identical to our previous work<sup>47</sup>. Elec-  
4 trodes were positioned immediately before stimulation onset and removed as soon at the stimula-  
5 tion ended. The anode electrode was centred over C3 (5 cm lateral to Cz) corresponding to the left  
6 primary motor cortex according to the international 10-20 System<sup>93</sup>. The reference electrode (cath-  
7 ode) was placed over the right supraorbital ridge. During anodal stimulation, the current intensity  
8 was set to 1 mA for 20 minutes with a ramp-up and ramp-down period of 10 seconds. During  
9 sham stimulation, the current also ramped up and down for 10 sec but no stimulation was delivered  
10 during the 20 minutes. Instead, small current pulses (110  $\mu$ A over 15 ms) occurred every 550 ms  
11 to simulate the tingling sensation associated with real anodal stimulation. Both experimenters and  
12 participants were blinded to the stimulation condition.

13 **Behavioural data analysis.** Statistical analyses of behaviour were performed in R<sup>94</sup>. Unless  
14 specified otherwise, all statistical tests were two-tailed. Analyses were performed using linear  
15 regression models. Linear mixed-effects models (LMMs) were used for analyses comprising a  
16 longitudinal/repeated-measures component by including intercepts and slopes as participant ran-  
17 dom effects. This approach had two advantages compared to traditional analyses of variance  
18 (ANOVAs): it allowed us to consider the within-block rate of change in addition to the mean  
19 error, and to dissociate between random sources of inter-individual variability from meaningful  
20 ones.

1        Because GABA is synthesised from glutamate, the concentrations of the two neurotransmit-  
2        ters are typically correlated in the brain<sup>95,96</sup>. Therefore, when analysing the relationship between  
3        the absolute concentration in GABA or Glx within a voxel and outcome, the concentration of  
4        the other neurotransmitter (GABA or Glx) was also included in the model. In addition, grey and  
5        white matter concentrations were also included as covariates of no interest in all models including  
6        neurochemical data.

7        A mediation analysis was used to characterise the “mechanistic” links underlying the ob-  
8        served correlations between age, neurochemistry, and retention. This was performed using the  
9        R package *mediation* for causal mediation analysis<sup>97</sup>. Mediation was conducted using regression  
10       with nonparametric bootstrapping (10,000 resamples) to ascertain whether the level of M1 tonic  
11       inhibition accounts for the link between age and long-term retention of the prism adaptation after-  
12       effect. It included age as the independent variable (X), M1 GABA and Glx absolute concentrations  
13       as mediators ( $M_1$ ,  $M_2$ ), and the block mean error on OLP 24 hours after PA normalised by the base-  
14       line (pre-PA) deviation as the dependent variable (Y), and controlled for the fraction of GM and  
15       WM in the M1 voxel ( $C_1$ ,  $C_2$ ). The percentage mediation ( $P_M$ ) was calculated as the fraction of  
16       total effect (c) accounted by indirect effects ( $ab_1$  or  $ab_2$ ).

17       **MRS data analysis.** Metabolites were quantified using LCModel<sup>98–100</sup> performed on all spectra  
18       within the chemical shift range 0.5 to 4.2 ppm. The model spectra were generated based on pre-  
19       viously reported chemical shifts and coupling constants by VeSPA Project (Versatile Stimulation,  
20       Pulses and Analysis). The unsuppressed water signal acquired from the volume of interest was

1 used to remove eddy current effects and to reconstruct the phased array spectra<sup>101</sup>. Single scan  
2 spectra were corrected for frequency and phase variations induced by subject motion before sum-  
3 mation. Glutamix (Glx) was used in the current study due to the inability to distinguish between  
4 glutamate and glutamine using a 3T MRI scanner. To avoid biasing the sample towards high con-  
5 centration estimates, an expected relative Cramér-Rao Lower Bound (CRLB) was computed for  
6 each individual dataset given the concentration estimate and assuming a constant level of noise  
7 across all measurements (see *SI* for detailed methods). Datasets for which the Pearson residual  
8 between the expected and observed relative CRLB exceeded 2 were excluded from subsequent  
9 analysis. Using this quality filtering criterion for  $\gamma$ -Aminobutyric acid (labelled GABA), Glutamix  
10 (Glutamine+Gutamate, labelled Glx) and total Creatine (Creatine + Phosphocreatine, labelled tCr),  
11 four V1 MRS datasets were discarded and no M1 MRS dataset was discarded.

12 Tissue correction is an important step in the analysis of MRS data, especially in older adults  
13 due to atrophy<sup>102</sup>. The output of LCmodel represents the metabolite concentration in the entire  
14 volume of interest. Therefore, if the fraction of neural tissue containing the metabolite of interest  
15 decreases, due to atrophy<sup>103</sup>, the concentration of this metabolite in the MRS voxel will necessarily  
16 be lower. However, this depletion does not reflect a reduction in the metabolite concentration *per*  
17 *se*, but rather is a by-product of atrophy. Several tissue correction techniques have been proposed  
18 to account for this possible confound, with currently no consensus in the literature<sup>104,105</sup>. Most of  
19 these techniques make assumptions about the distribution of the metabolite of interest within the  
20 different tissue compartments. Such assumptions may not hold across the lifespan, as the normal  
21 ageing process may affect some compartments more so than others. To avoid this potential caveat,

1 all analyses reported in this paper used non-tissue corrected concentration estimates and included  
2 the percentage of grey matter (GM) and white matter (WM) present in the voxel as confounding  
3 variables of no interest (see, for example, method used in <sup>106</sup>). This partial volume correction  
4 approach makes no assumption regarding the distribution of GABA and Glx within the different  
5 tissue types, which makes it more valid in the context of ageing. The percentage grey matter, white  
6 matter, and cerebrospinal fluid present in the volume of interest were calculated using FMRIBs  
7 automated segmentation tool<sup>107</sup>.

8 Across individuals, the total creatine concentration estimate was negatively correlated with  
9 age in the M1 voxel ( $r_{(22)} = -0.46, p = 0.04$ ) but not in the V1 voxel ( $r_{(18)} = -0.06, p = 0.81$ ;  
10 Fig. S2c). The relationship with age in the M1 voxel is, therefore, problematic when using tCr for  
11 internal referencing. Throughout the study, we therefore report absolute concentration estimates,  
12 rather than ratios to tCr, for GABA and Glx.

### 13 **Acknowledgements**

14 This study was supported by the NIHR Oxford Health Biomedical Research Centre. The views ex-  
15 pressed are those of the authors and not necessarily those of the NHS, the NIHR or the Department  
16 of Healthy. PP was funded by a scholarship from the Marie Skłodowska-Curie Initial Training  
17 Network (Adaptive Brain Computations). GS was funded by an Australian National Health and  
18 Medical Research Council (NHMRC APP1104692) Early Career Fellowship. HJB is supported  
19 by a Principal Fellowship from the Wellcome Trust (110027/Z/15/Z). JOS is supported by a Sir

1 Henry Dale Fellowship from the Royal Society and the Wellcome Trust (HQR01720). The Well-  
2 come Centre for Integrative Neuroimaging is supported by core funding from the Wellcome Trust  
3 (203139/Z/16/Z). For the purpose of Open Access, the authors have applied a CC BY public copy-  
4 right licence to any Author Accepted Manuscript version arising from this submission. We thank  
5 Rebecca Annells for her help collecting data in experiment 1.

## 6 **References**

- 8 1. Krampe, R. T. Aging, expertise and fine motor movement. *Neuroscience Biobehavioral*  
9 *Reviews* **26**, 769 – 776 (2002). URL [http://www.sciencedirect.com/science/](http://www.sciencedirect.com/science/article/pii/S0149763402000647)  
10 [article/pii/S0149763402000647](http://www.sciencedirect.com/science/article/pii/S0149763402000647).
- 11 2. Hunter, S. K., Pereira, H. M. & Keenan, K. G. The aging neuromuscular system and motor  
12 performance. *Journal of Applied Physiology* **121**, 982–995 (2016). URL [https://doi.](https://doi.org/10.1152/jappphysiol.00475.2016)  
13 [org/10.1152/jappphysiol.00475.2016](https://doi.org/10.1152/jappphysiol.00475.2016). PMID: 27516536, [https://doi.](https://doi.org/10.1152/jappphysiol.00475.2016)  
14 [org/10.1152/jappphysiol.00475.2016](https://doi.org/10.1152/jappphysiol.00475.2016).
- 15 3. Bedard, A.-C. *et al.* The development of selective inhibitory control across the life span.  
16 *Developmental Neuropsychology* **21**, 93–111 (2002). URL [https://doi.org/10.](https://doi.org/10.1207/S15326942DN2101_5)  
17 [1207/S15326942DN2101\\_5](https://doi.org/10.1207/S15326942DN2101_5). PMID: 12058837, [https://doi.org/10.1207/](https://doi.org/10.1207/S15326942DN2101_5)  
18 [S15326942DN2101\\_5](https://doi.org/10.1207/S15326942DN2101_5).
- 19 4. Jimnez-Jimnez, F. J. *et al.* Influence of age and gender in motor performance in healthy  
20 subjects. *Journal of the Neurological Sciences* **302**, 72 – 80 (2011). URL <http://www>.



- 1        [sciencedirect.com/science/article/pii/S0022510X10005691](https://www.sciencedirect.com/science/article/pii/S0022510X10005691).
- 2        5. Frontera, W. R. *et al.* Aging of skeletal muscle: a 12-yr longitudinal study. *Journal of Ap-*  
3        *plied Physiology* **88**, 1321–1326 (2000). URL [https://doi.org/10.1152/jappl.](https://doi.org/10.1152/jappl.2000.88.4.1321)  
4        2000.88.4.1321. PMID: 10749826, [https://doi.org/10.1152/jappl.](https://doi.org/10.1152/jappl.2000.88.4.1321)  
5        2000.88.4.1321.
- 6        6. Serrien, D. J., Swinnen, S. P. & Stelmach, G. E. Age-Related Deterioration of Co-  
7        ordinated Interlimb Behavior. *The Journals of Gerontology: Series B* **55**, P295–  
8        P303 (2000). URL [https://doi.org/10.1093/geronb/55.5.P295.](https://doi.org/10.1093/geronb/55.5.P295)  
9        [https://academic.oup.com/psychsocgerontology/article-pdf/](https://academic.oup.com/psychsocgerontology/article-pdf/55/5/P295/9908825/P295.pdf)  
10        55/5/P295/9908825/P295.pdf.
- 11        7. Leeson, G. W. The growth, ageing and urbanisation of our world. *Journal*  
12        *of Population Ageing* **11**, 107–115 (2018). URL [https://doi.org/10.1007/](https://doi.org/10.1007/s12062-018-9225-7)  
13        s12062-018-9225-7.
- 14        8. Dayan, E. & Cohen, L. Neuroplasticity subserving motor skill learning. *Neuron* **72**, 443 –  
15        454 (2011). URL [http://www.sciencedirect.com/science/article/pii/](http://www.sciencedirect.com/science/article/pii/S0896627311009184)  
16        S0896627311009184.
- 17        9. Sampaio-Baptista, C., Sanders, Z.-B. & Johansen-Berg, H. Structural plastic-  
18        ity in adulthood with motor learning and stroke rehabilitation. *Annual Re-*  
19        *view of Neuroscience* **41**, 25–40 (2018). URL <https://doi.org/10.1146/>

- 1        annurev-neuro-080317-062015. PMID: 29490196, <https://doi.org/10.1146/annurev-neuro-080317-062015>.
- 2        1146/annurev-neuro-080317-062015.
- 3        10. Rozycka, A. & Liguz-Leczmar, M. The space where aging acts: focus on the gabaergic  
4        synapse. *Aging Cell* (2017).
- 5        11. McNeil, C. J. & Rice, C. L. Neuromuscular adaptations to healthy aging. *Applied Physiology,*  
6        *Nutrition, and Metabolism* **43**, 1158+ (2018).
- 7        12. Burke, S. N. & Barnes, C. A. Neural plasticity in the ageing brain. *Nature reviews neuro-*  
8        *science* **7**, 30 (2006).
- 9        13. Rogasch, N. C., Dartnall, T. J., Cirillo, J., Nordstrom, M. A. & Semmler, J. G. Corticom-  
10        tor plasticity and learning of a ballistic thumb training task are diminished in older adults.  
11        *Journal of Applied Physiology* **107**, 1874–1883 (2009). URL <https://doi.org/10.1152/jappphysiol.00443.2009>. PMID: 19833810, <https://doi.org/10.1152/jappphysiol.00443.2009>.
- 12        1152/jappphysiol.00443.2009. PMID: 19833810, <https://doi.org/10.1152/jappphysiol.00443.2009>.
- 13        1152/jappphysiol.00443.2009.
- 14        14. Freitas, C., Farzan, F. & Pascual-Leone, A. Assessing brain plasticity across the lifespan  
15        with transcranial magnetic stimulation: why, how, and what is the ultimate goal? *Frontiers*  
16        *in Neuroscience* **7**, 42 (2013). URL [https://www.frontiersin.org/article/](https://www.frontiersin.org/article/10.3389/fnins.2013.00042)  
17        [10.3389/fnins.2013.00042](https://www.frontiersin.org/article/10.3389/fnins.2013.00042).
- 18        15. Bhandari, A. *et al.* A meta-analysis of the effects of aging on motor cortex neurophysi-  
19        ology assessed by transcranial magnetic stimulation. *Clinical Neurophysiology* **127**, 2834

- 1       – 2845 (2016). URL [http://www.sciencedirect.com/science/article/](http://www.sciencedirect.com/science/article/pii/S1388245716304266)  
2       [pii/S1388245716304266](http://www.sciencedirect.com/science/article/pii/S1388245716304266).
- 3   16. David-Jrgens, M. & Dinse, H. R. Effects of Aging on Paired-Pulse Behavior of  
4       Rat Somatosensory Cortical Neurons. *Cerebral Cortex* **20**, 1208–1216 (2009). URL  
5       <https://doi.org/10.1093/cercor/bhp185>. [https://academic.oup.](https://academic.oup.com/cercor/article-pdf/20/5/1208/964513/bhp185.pdf)  
6       [com/cercor/article-pdf/20/5/1208/964513/bhp185.pdf](https://academic.oup.com/cercor/article-pdf/20/5/1208/964513/bhp185.pdf).
- 7   17. Schmidt, S., Redecker, C., Bruehl, C. & Witte, O. Age-related decline of functional  
8       inhibition in rat cortex. *Neurobiology of Aging* **31**, 504 – 511 (2010). URL [http:](http://www.sciencedirect.com/science/article/pii/S0197458008001309)  
9       [//www.sciencedirect.com/science/article/pii/S0197458008001309](http://www.sciencedirect.com/science/article/pii/S0197458008001309).
- 10   18. Peinemann, A., Lehner, C., Conrad, B. & Siebner, H. R. Age-related decrease in paired-pulse  
11       intracortical inhibition in the human primary motor cortex. *Neuroscience letters* **313**, 33–36  
12       (2001).
- 13   19. Oliviero, A. *et al.* Effects of aging on motor cortex excitability. *Neuroscience research* **55**,  
14       74–77 (2006).
- 15   20. Lenz, M. *et al.* Increased excitability of somatosensory cortex in aged humans is as-  
16       sociated with impaired tactile acuity. *Journal of Neuroscience* **32**, 1811–1816 (2012).  
17       URL <https://www.jneurosci.org/content/32/5/1811>. [https://www.](https://www.jneurosci.org/content/32/5/1811.full.pdf)  
18       [jneurosci.org/content/32/5/1811.full.pdf](https://www.jneurosci.org/content/32/5/1811.full.pdf).

- 1 21. Cheng, C.-H. & Lin, Y.-Y. Aging-related decline in somatosensory inhibition of the human  
2 cerebral cortex. *Experimental Brain Research* **226**, 145–152 (2013). URL <https://doi.org/10.1007/s00221-013-3420-9>.
- 3
- 4 22. Gao, F. *et al.* Edited magnetic resonance spectroscopy detects an age-related decline in brain  
5 gaba levels. *Neuroimage* **78**, 75–82 (2013).
- 6 23. Heise, K.-F. *et al.* The aging motor system as a model for plastic changes of gaba-mediated  
7 intracortical inhibition and their behavioral relevance. *Journal of Neuroscience* **33**, 9039–  
8 9049 (2013).
- 9 24. Levin, O., Fujiyama, H., Boisgontier, M. P., Swinnen, S. P. & Summers, J. J. Aging  
10 and motor inhibition: A converging perspective provided by brain stimulation and imag-  
11 ing approaches. *Neuroscience Biobehavioral Reviews* **43**, 100 – 117 (2014). URL <http://www.sciencedirect.com/science/article/pii/S0149763414000852>.
- 12
- 13 25. Mooney, R. A., Cirillo, J. & Byblow, W. D. Gaba and primary motor cortex inhibition  
14 in young and older adults: a multimodal reliability study. *Journal of Neurophysiology*  
15 **118**, 425–433 (2017). URL <https://doi.org/10.1152/jn.00199.2017>. PMID:  
16 28424294, <https://doi.org/10.1152/jn.00199.2017>.
- 17 26. Hermans, L. *et al.* Brain gaba levels are associated with inhibitory control deficits  
18 in older adults. *Journal of Neuroscience* **38**, 7844–7851 (2018). URL <https://www.jneurosci.org/content/38/36/7844>. <https://www.jneurosci.org/content/38/36/7844.full.pdf>.
- 19
- 20

- 1 27. Marengo, S. *et al.* Role of gamma-amino-butyric acid in the dorsal anterior cingulate in age-  
2 associated changes in cognition. *Neuropsychopharmacology* **43**, 2285–2291 (2018). URL  
3 <https://doi.org/10.1038/s41386-018-0134-5>.
- 4 28. Simmonite, M. *et al.* Age-related declines in occipital gaba are associated with reduced fluid  
5 processing ability. *Academic Radiology* **26**, 1053 – 1061 (2019). URL <http://www.sciencedirect.com/science/article/pii/S1076633218304008>.  
6
- 7 29. Chamberlain, J. D. *et al.* Gaba levels in ventral visual cortex decline with age and are as-  
8 sociated with neural distinctiveness. *bioRxiv* (2019). URL <https://www.biorxiv.org/content/early/2019/08/22/743674>. <https://www.biorxiv.org/content/early/2019/08/22/743674.full.pdf>.  
9  
10
- 11 30. Kolasinski, J. *et al.* A mechanistic link from gaba to cortical architecture and perception.  
12 *Current Biology* (2017).
- 13 31. Papegaaij, S., Taube, W., Hogenhout, M., Baudry, S. & Hortobgyi, T. Age-related decrease in  
14 motor cortical inhibition during standing under different sensory conditions. *Frontiers in Ag-  
15 ing Neuroscience* **6**, 126 (2014). URL [https://www.frontiersin.org/article/  
16 10.3389/fnagi.2014.00126](https://www.frontiersin.org/article/10.3389/fnagi.2014.00126).
- 17 32. Swanson, C. W. & Fling, B. W. Associations between gait coordination, variability and  
18 motor cortex inhibition in young and older adults. *Experimental Gerontology* **113**, 163 –  
19 172 (2018). URL [http://www.sciencedirect.com/science/article/pii/  
20 S0531556518304182](http://www.sciencedirect.com/science/article/pii/S0531556518304182).

- 1 33. Franklin, D. W. & Wolpert, D. M. Computational mechanisms of sensorimotor control.  
2 *Neuron* **72**, 425–442 (2011).
- 3 34. Wolpert, D. M., Diedrichsen, J. & Flanagan, J. R. Principles of sensorimotor learning. *Nature*  
4 *Reviews Neuroscience* **12**, 739–751 (2011).
- 5 35. Fernandez-Ruiz, J., Hall, C., Vergara, P. & Daz, R. Prism adaptation in normal aging: slower  
6 adaptation rate and larger aftereffect. *Cognitive Brain Research* **9**, 223–226 (2000).
- 7 36. Roller, C. A., Cohen, H. S., Kimball, K. T. & Bloomberg, J. J. Effects of normal aging on  
8 visuo-motor plasticity. *Neurobiology of aging* **23**, 117–123 (2002).
- 9 37. Buch, E. R., Young, S. & Contreras-Vidal, J. L. Visuomotor adaptation in normal aging.  
10 *Learning & memory* **10**, 55–63 (2003).
- 11 38. Bock, O. Components of sensorimotor adaptation in young and elderly subjects. *Experimen-*  
12 *tal Brain Research* **160**, 259–263 (2005).
- 13 39. Hegele, M. & Heuer, H. Adaptation to a direction-dependent visuomotor gain in the young  
14 and elderly. *Psychological Research PRPF* **74**, 21 (2010).
- 15 40. Anguera, J. A., Reuter-Lorenz, P. A., Willingham, D. T. & Seidler, R. D. Failure to engage  
16 spatial working memory contributes to age-related declines in visuomotor learning. *Journal*  
17 *of cognitive neuroscience* **23**, 11–25 (2011).
- 18 41. Huang, H. J. & Ahmed, A. A. Older adults learn less, but still reduce metabolic cost, during  
19 motor adaptation. *Journal of neurophysiology* **111**, 135–144 (2014).

- 1 42. Nemanich, S. T. & Earhart, G. M. How do age and nature of the motor task influence  
2 visuomotor adaptation? *Gait & posture* **42**, 564–568 (2015).
- 3 43. Panouillres, M. T., Joundi, R. A., Brittain, J.-S. & Jenkinson, N. Reversing motor adaptation  
4 deficits in the ageing brain using non-invasive stimulation. *The Journal of physiology* **593**,  
5 3645–3655 (2015).
- 6 44. Vandevorde, K. & de Xivry, J.-J. O. Internal model recalibration does not deteriorate with  
7 age while motor adaptation does. *Neurobiology of aging* **80**, 138–153 (2019).
- 8 45. Wolpe, N. *et al.* Age-related reduction in motor adaptation: brain structural correlates  
9 and the role of explicit memory. *Neurobiology of Aging* (2020). URL <http://www.sciencedirect.com/science/article/pii/S019745802030049X>.
- 10
- 11 46. Galea, J. M., Mallia, E., Rothwell, J. & Diedrichsen, J. The dissociable effects of punishment  
12 and reward on motor learning. *Nature neuroscience* **18**, 597–602 (2015).
- 13 47. O’Shea, J. *et al.* Induced sensorimotor cortex plasticity remediates chronic treatment-  
14 resistant visual neglect. *eLife* **6** (2017).
- 15 48. Petitet, P. *et al.* Causal explanation of individual differences in human sensorimotor memory  
16 formation. *bioRxiv* (2018). URL <https://www.biorxiv.org/content/early/2018/01/29/255091>.  
17 <https://www.biorxiv.org/content/early/2018/01/29/255091.full.pdf>.  
18
- 19 49. von Helmholtz, H. *Treatise on physiological optics*, vol. 3 (Courier Corporation, 1867).

- 1 50. Stagg, C. J. *et al.* Polarity-sensitive modulation of cortical neurotransmitters by transcranial  
2 stimulation. *Journal of Neuroscience* **29**, 5202–5206 (2009).
- 3 51. Antonenko, D. *et al.* tDCS-induced modulation of GABA levels and resting-state functional  
4 connectivity in older adults. *Journal of Neuroscience* **37**, 4065–4073 (2017).
- 5 52. Smith, M. *et al.* Menstrual cycle effects on cortical excitability. *Neurology* **53**, 2069–2069  
6 (1999).
- 7 53. Epperson, C. N. *et al.* Cortical  $\gamma$ -aminobutyric acid levels across the menstrual cycle in  
8 healthy women and those with premenstrual dysphoric disorder: A proton magnetic reso-  
9 nance spectroscopy study. *Archives of general psychiatry* **59**, 851–858 (2002).
- 10 54. Inoue, M. *et al.* Three timescales in prism adaptation. *Journal of neurophysiology* **113**,  
11 328–338 (2015).
- 12 55. Simmonite, M. *et al.* Age-Related declines in occipital GABA are associated with reduced  
13 fluid processing ability. *Acad. Radiol.* **26**, 1053–1061 (2019).
- 14 56. Chamberlain, J. D. *et al.* GABA levels in ventral visual cortex decline with age and are as-  
15 sociated with neural distinctiveness. *bioRxiv* (2019). URL [https://www.biorxiv.org/](https://www.biorxiv.org/content/early/2019/08/22/743674)  
16 [content/early/2019/08/22/743674](https://www.biorxiv.org/content/early/2019/08/22/743674). [https://www.biorxiv.org/](https://www.biorxiv.org/content/early/2019/08/22/743674.full.pdf)  
17 [content/early/2019/08/22/743674.full.pdf](https://www.biorxiv.org/content/early/2019/08/22/743674.full.pdf).
- 18 57. Marinescu, I. E., Lawlor, P. N. & Kording, K. P. Quasi-experimental causality in neuroscience  
19 and behavioural research. *Nature Human Behaviour* **2**, 891–898 (2018). URL <https://doi.org/10.1038/s41562-018-0466-5>.
- 20



- 1 58. Stagg, C. J. & Nitsche, M. A. Physiological basis of transcranial direct current stimulation.  
2 *The Neuroscientist* **17**, 37–53 (2011).
- 3 59. Siebner, H. R. *et al.* Preconditioning of low-frequency repetitive transcranial magnetic stim-  
4 ulation with transcranial direct current stimulation: Evidence for homeostatic plasticity in  
5 the human motor cortex. *Journal of Neuroscience* **24**, 3379–3385 (2004). URL <https://www.jneurosci.org/content/24/13/3379>. <https://www.jneurosci.org/content/24/13/3379.full.pdf>.  
6  
7
- 8 60. Lang, N. *et al.* Preconditioning with transcranial direct current stimulation sensitizes the  
9 motor cortex to rapid-rate transcranial magnetic stimulation and controls the direction of  
10 after-effects. *Biological psychiatry* **56**, 634–639 (2004).
- 11 61. Nitsche, M. A. *et al.* Timing-dependent modulation of associative plasticity by general  
12 network excitability in the human motor cortex. *Journal of Neuroscience* **27**, 3807–3812  
13 (2007). URL <https://www.jneurosci.org/content/27/14/3807>. <https://www.jneurosci.org/content/27/14/3807.full.pdf>.  
14
- 15 62. Krause, B., Mrquez-Ruiz, J. & Kadosh, R. C. The effect of transcranial direct current stim-  
16 ulation: a role for cortical excitation/inhibition balance? *Frontiers in human neuroscience* **7**  
17 (2013).
- 18 63. Karabanov, A. *et al.* Consensus paper: Probing homeostatic plasticity of human  
19 cortex with non-invasive transcranial brain stimulation. *Brain Stimulation* **8**, 993

- 1       – 1006 (2015). URL [http://www.sciencedirect.com/science/article/](http://www.sciencedirect.com/science/article/pii/S1935861X15010190)  
2       pii/S1935861X15010190.
- 3   64. Körding, K. P. *et al.* Causal inference in multisensory perception. *PLoS One* **2**, e943 (2007).
- 4   65. Lunghi, C., Emir, U. E., Morrone, M. C. & Bridge, H. Short-term monocular deprivation  
5       alters gaba in the adult human visual cortex. *Current Biology* **25**, 1496–1501 (2015).
- 6   66. Ip, I. B. *et al.* Combined fmri-mrs acquires simultaneous glutamate and bold-fmri signals in  
7       the human brain. *NeuroImage* **155**, 113–119 (2017).
- 8   67. Datta, A. *et al.* Gyri-precise head model of transcranial direct current stimulation: improved  
9       spatial focality using a ring electrode versus conventional rectangular pad. *Brain stimulation*  
10      **2**, 201–207 (2009).
- 11   68. Thielscher, A., Antunes, A. & Saturnino, G. B. Field modeling for transcranial magnetic  
12       stimulation: A useful tool to understand the physiological effects of tms? In *Engineering in*  
13       *Medicine and Biology Society (EMBC), 2015 37th Annual International Conference of the*  
14       *IEEE*, 222–225 (IEEE, 2015).
- 15   69. Huang, Y. *et al.* Measurements and models of electric fields in the in vivo human brain during  
16       transcranial electric stimulation. *Elife* **6**, e18834 (2017).
- 17   70. Wise, S., Moody, S., Blomstrom, K. & Mitz, A. Changes in motor cortical activity during  
18       visuomotor adaptation. *Experimental Brain Research* **121**, 285–299 (1998).

- 1 71. Li, C.-S. R., Padoa-Schioppa, C. & Bizzi, E. Neuronal correlates of motor performance and  
2 motor learning in the primary motor cortex of monkeys adapting to an external force field.  
3 *Neuron* **30**, 593–607 (2001).
- 4 72. Paz, R., Boraud, T., Natan, C., Bergman, H. & Vaadia, E. Preparatory activity in motor cortex  
5 reflects learning of local visuomotor skills. *Nature neuroscience* **6**, 882–890 (2003).
- 6 73. Paz, R., Natan, C., Boraud, T., Bergman, H. & Vaadia, E. Emerging patterns of neuronal  
7 responses in supplementary and primary motor areas during sensorimotor adaptation. *Journal*  
8 *of Neuroscience* **25**, 10941–10951 (2005).
- 9 74. Hadipour-Niktarash, A., Lee, C. K., Desmond, J. E. & Shadmehr, R. Impairment of retention  
10 but not acquisition of a visuomotor skill through time-dependent disruption of primary motor  
11 cortex. *Journal of Neuroscience* **27**, 13413–13419 (2007).
- 12 75. Galea, J. M., Vazquez, A., Pasricha, N., de Xivry, J.-J. O. & Celnik, P. Dissociating the roles  
13 of the cerebellum and motor cortex during adaptive learning: the motor cortex retains what  
14 the cerebellum learns. *Cereb. Cortex* **21**, 1761–1770 (2011).
- 15 76. Landi, S. M., Baguear, F. & Della-Maggiore, V. One week of motor adaptation induces  
16 structural changes in primary motor cortex that predict long-term memory one year later.  
17 *Journal of Neuroscience* **31**, 11808–11813 (2011).
- 18 77. Leow, L.-A., Marinovic, W., Chye, L., Carroll, T. J. & Riek, S. The primary motor cortex is  
19 critical for the retention of implicit sensorimotor adaptation. *bioRxiv* 096404 (2016).

- 1 78. Hummel, F. *et al.* Effects of non-invasive cortical stimulation on skilled motor function in  
2 chronic stroke. *Brain* **128**, 490–499 (2005).
- 3 79. Hummel, F. C. & Cohen, L. G. Non-invasive brain stimulation: a new strategy to improve  
4 neurorehabilitation after stroke? *The Lancet Neurology* **5**, 708–712 (2006).
- 5 80. Stagg, C. J. *et al.* Cortical activation changes underlying stimulation-induced behavioural  
6 gains in chronic stroke. *Brain* **135**, 276–284 (2011). URL [https://doi.org/10.](https://doi.org/10.1093/brain/awr313)  
7 [1093/brain/awr313.](http://oup.prod.sis.lan/brain/article-pdf/135/1/276/13794932/awr313.pdf) [http://oup.prod.sis.lan/brain/article-pdf/](http://oup.prod.sis.lan/brain/article-pdf/135/1/276/13794932/awr313.pdf)  
8 [135/1/276/13794932/awr313.pdf](http://oup.prod.sis.lan/brain/article-pdf/135/1/276/13794932/awr313.pdf).
- 9 81. Meinzer, M., Darkow, R., Lindenberg, R. & Flöel, A. Electrical stimulation of the motor  
10 cortex enhances treatment outcome in post-stroke aphasia. *Brain* **139**, 1152–1163 (2016).
- 11 82. Chew, T., Ho, K.-A. & Loo, C. K. Inter-and intra-individual variability in response to tran-  
12 scranial direct current stimulation (tdcs) at varying current intensities. *Brain Stimulation* **8**,  
13 1130–1137 (2015).
- 14 83. Fujiyama, H. *et al.* Preconditioning tdcs facilitates subsequent tdcs effect on skill acquisition  
15 in older adults. *Neurobiology of aging* **51**, 31–42 (2017).
- 16 84. Kleiner, M., Brainard, D. & Pelli, D. What’s new in psychtoolbox-3? (2007).
- 17 85. OShea, J. *et al.* Kinematic markers dissociate error correction from sensorimotor realignment  
18 during prism adaptation. *Neuropsychologia* **55**, 15–24 (2014).

- 1 86. Redding, G. M. & Wallace, B. Adaptive spatial alignment and strategic perceptual-motor  
2 control. *Journal of Experimental Psychology: Human Perception and Performance* **22**, 379  
3 (1996).
- 4 87. Redding, G. M. & Wallace, B. Calibration and alignment are separable: Evidence from prism  
5 adaptation. *Journal of motor behavior* **33**, 401–412 (2001).
- 6 88. Redding, G. M. & Wallace, B. Effects of pointing rate and availability of visual feedback on  
7 visual and proprioceptive components of prism adaptation. *Journal of Motor Behavior* **24**,  
8 226–237 (1992). URL <https://doi.org/10.1080/00222895.1992.9941618>.  
9 PMID: 12736128, <https://doi.org/10.1080/00222895.1992.9941618>.
- 10 89. Yousry, T. *et al.* Localization of the motor hand area to a knob on the precentral gyrus. a new  
11 landmark. *Brain: a journal of neurology* **120**, 141–157 (1997).
- 12 90. Engel, S. A., Glover, G. H. & Wandell, B. A. Retinotopic organization in human visual cortex  
13 and the spatial precision of functional mri. *Cerebral cortex (New York, NY: 1991)* **7**, 181–192  
14 (1997).
- 15 91. Bank, B. *et al.* Multi-center reproducibility of neurochemical profiles in the human brain at  
16 7 t. *NMR in Biomedicine* **28**, 306–316 (2015).
- 17 92. z, G. & Tk, I. Short-echo, single-shot, full-intensity proton magnetic resonance spectroscopy  
18 for neurochemical profiling at 4 t: Validation in the cerebellum and brainstem. *Magnetic*  
19 *resonance in medicine* **65**, 901–910 (2011).

- 1 93. Herwig, U., Satrapi, P. & Schnfeldt-Lecuona, C. Using the international 10-20 eeg system  
2 for positioning of transcranial magnetic stimulation. *Brain topography* **16**, 95–99 (2003).
- 3 94. R Core Team. *R: A Language and Environment for Statistical Computing*. R Foundation for  
4 Statistical Computing, Vienna, Austria (2017). URL <https://www.R-project.org/>.
- 5 95. Stagg, C. J., Bachtiar, V. & Johansen-Berg, H. The role of gaba in human motor learning.  
6 *Current Biology* **21**, 480–484 (2011).
- 7 96. Jocham, G., Hunt, L. T., Near, J. & Behrens, T. E. A mechanism for value-guided choice  
8 based on the excitation-inhibition balance in prefrontal cortex. *Nature neuroscience* **15**, 960–  
9 961 (2012).
- 10 97. Imai, K., Keele, L., Tingley, D. & Yamamoto, T. Causal mediation analysis using r. In Vinod,  
11 H. D. (ed.) *Advances in Social Science Research Using R* (Springer-Verlag, New York, 2010).
- 12 98. Provencher, S. W. Estimation of metabolite concentrations from localized in vivo proton nmr  
13 spectra. *Magnetic resonance in medicine* **30**, 672–679 (1993).
- 14 99. Provencher, S. W. Automatic quantitation of localized in vivo <sup>1</sup>h spectra with lmodel. *NMR*  
15 *in Biomedicine* **14**, 260–264 (2001).
- 16 100. Provencher, S. Lcmodel & lcmgui users manual. *Stephen Provencher Inc* (2012).
- 17 101. Natt, O., Bezkorovaynyy, V., Michaelis, T. & Frahm, J. Use of phased array coils for a  
18 determination of absolute metabolite concentrations. *Magnetic resonance in medicine* **53**,  
19 3–8 (2005).

- 1 102. Porges, E. C. *et al.* Frontal gamma-aminobutyric acid concentrations are associated with  
2 cognitive performance in older adults. *Biological psychiatry: cognitive neuroscience and*  
3 *neuroimaging* **2**, 38–44 (2017).
- 4 103. Good, C. D. *et al.* A voxel-based morphometric study of ageing in 465 normal adult human  
5 brains. In *Biomedical Imaging, 2002. 5th IEEE EMBS International Summer School on*,  
6 16–pp (IEEE, 2002).
- 7 104. Harris, A. D., Puts, N. A. & Edden, R. A. Tissue correction for gaba-edited mrs: Considera-  
8 tions of voxel composition, tissue segmentation, and tissue relaxations. *Journal of Magnetic*  
9 *Resonance Imaging* **42**, 1431–1440 (2015).
- 10 105. Porges, E. C. *et al.* Impact of tissue correction strategy on gaba-edited mrs findings. *Neu-*  
11 *roImage* **162**, 249–256 (2017).
- 12 106. Scholl, J. *et al.* Excitation and inhibition in anterior cingulate predict use of past experiences.  
13 *eLife* **6**, e20365 (2017).
- 14 107. Patenaude, B., Smith, S. M., Kennedy, D. N. & Jenkinson, M. A bayesian model of shape  
15 and appearance for subcortical brain segmentation. *Neuroimage* **56**, 907–922 (2011).
- 16 108. Tisell, A., Leinhard, O. D., Warntjes, J. B. M. & Lundberg, P. Procedure for quantitative  
17 1h magnetic resonance spectroscopy and tissue characterization of human brain tissue based  
18 on the use of quantitative magnetic resonance imaging. *Magnetic resonance in medicine* **70**,  
19 905–915 (2013).

- 1 109. Kreis, R. The trouble with quality filtering based on relative cramr-rao lower bounds. *Magnetic resonance in medicine* **75**, 15–18 (2016).
- 2
- 3 110. Tu, Y.-K. & Gilthorpe, M. S. Revisiting the relation between change and initial value: a review and evaluation. *Statistics in medicine* **26**, 443–457 (2007).
- 4
- 5 111. Blance, A., Tu, Y.-K. & Gilthorpe, M. S. A multilevel modelling solution to mathematical coupling. *Statistical methods in medical research* **14**, 553–565 (2005).
- 6
- 7 112. Minichiello, L. Trkb signalling pathways in ltp and learning. *Nature reviews. Neuroscience* **10**, 850 (2009).
- 8
- 9 113. Kleim, J. A. *et al.* Bdnf val66met polymorphism is associated with modified experience-dependent plasticity in human motor cortex. *Nature neuroscience* **9**, 735–737 (2006).
- 10
- 11 114. Fritsch, B. *et al.* Direct current stimulation promotes bdnf-dependent synaptic plasticity: potential implications for motor learning. *Neuron* **66**, 198–204 (2010).
- 12
- 13 115. McHughen, S. A., Pearson-Fuhrhop, K., Ngo, V. K. & Cramer, S. C. Intense training overcomes effects of the val66met bdnf polymorphism on short-term plasticity. *Experimental brain research* **213**, 415 (2011).
- 14
- 15
- 16 116. Joundi, R. A. *et al.* The effect of bdnf val66met polymorphism on visuomotor adaptation. *Experimental brain research* **223**, 43–50 (2012).
- 17
- 18 117. Chen, X. *et al.* A chemical-genetic approach to studying neurotrophin signaling. *Neuron* **46**, 13–21 (2005).
- 19



- 1 118. Egan, M. F. *et al.* The bdnf val66met polymorphism affects activity-dependent secretion of  
2 bdnf and human memory and hippocampal function. *Cell* **112**, 257–269 (2003).
- 3 119. Verhagen, M. *et al.* Meta-analysis of the bdnf val66met polymorphism in major depressive  
4 disorder: effects of gender and ethnicity. *Molecular psychiatry* **15**, 260–271 (2010).

## Supplementary Information

### Supplementary methods

**MRS data filtering procedure.** Some authors have warned against the usage of  $\%CRLB$  for MRS quality filtering because it could lead to wrong or missed statistical findings<sup>108,109</sup>. For equivalent metabolite concentrations, large levels of noise caused by bad quality acquisition (e.g. too small voxel size, not enough averages, bad shimming) or bad quality spectrum fitting (e.g. inappropriate basis files) would result in an increase in  $\%CRLB$ , in a way that truly reflects estimation uncertainty. Thus, in this scenario, it would be valid to mistrust the data based on a high  $\%CRLB$ . However, because of the *relative* nature of the  $\%CRLB$ , this metric also strongly depends on its denominator, i.e. the estimated metabolite concentration. Thus, for equivalent levels of noise, a true decrease in the metabolite concentration would also be associated with an increase in  $\%CRLB$ . In this scenario, however, it is no longer valid to reject such datasets. When measuring a change in GABA concentration following an intervention (e.g. anodal transcranial direct current stimulation, a-tDCS), this selection bias may artificially inflate the chances of detecting a reduction post-intervention, simply by virtue of regression towards the mean<sup>110,111</sup>. Additionally, it might be the case that individuals with higher baseline GABA levels are more likely to respond to a-tDCS than those with low basal GABA levels.

To avoid this methodological caveat we took into consideration the concentration estimate when rejecting datasets with high  $\%CRLB$ . Datasets might have a high  $\%CRLB$  because of a low

1 concentration estimate rather than an excessive level of noise. We suggest that such datasets should  
2 not be excluded. Alternatively, datasets might have low  $\%CRLB$  merely because the concentration  
3 estimate is high. However, it might be the case the the level of  $\%CRLB$  is excessively high, given  
4 the metabolite concentration. Such datasets should be excluded.

5 We propose the following method as an alternative to standard  $\%CRLB$ -based quality filter-  
6 ing. First, the following model is fitted to the “concentration estimate  $\times$   $\%CRLB$ ” relationship:

$$7 \quad \text{Expected } \%CRLB_i = \frac{N_i}{C_i} \quad (1)$$

8 where  $N_i$  represents a group noise constant and  $C_i$  the concentration estimates for a metabo-  
9 lite  $i$ . If this simple model can explain most of the variance in the observed relationship between  
10 concentration estimates and  $\%CRLB$ , it means that the level of noise is relatively constant across  
11 all measurements. However, any deviation from this model reflects an *unusual* level of noise  
12 compared to the other measurements. For each measurement, deviation from the model can be  
13 expressed as the Pearson residual as follows:

$$14 \quad e_i = \frac{r}{\sqrt{MSE}} \quad (2)$$

15 where  $r_i$  is the raw residual (i.e. difference between the  $\%CRLB$  and *expected*  $\%CRLB$  for a certain  
16 measurement) and  $MSE$  is the mean squared error (i.e. mean deviation of all measurements from

1 the model). The greater the Pearson residual for a given measurement, the noisier it is in regard to  
2 the rest of the data, irrespective of the concentration estimate. Note that this method did not reject  
3 the lower tail of the distribution entirely and therefore does not induce a selection bias towards  
4 high concentration estimates.

## 5 **Supplementary Results**

6 **Effect of BDNF polymorphism on stimulation effect.** Brain-derived Neurotrophic Factor (BDNF)  
7 is important for synaptic plasticity induction and is known to mediate the effect of direct current  
8 stimulation<sup>112</sup>. Individuals with the BDNF val66met polymorphism exhibit reduced behavioural  
9 and neural markers of motor cortical plasticity<sup>113–116</sup>. The val66met polymorphism causes a partial  
10 reduction in activity-dependent BDNF secretion, a factor involved in long-term potentiation<sup>112,117,118</sup>.  
11 Augmentation of BDNF-dependent synaptic plasticity is a candidate mechanism of action of sen-  
12 sorimotor cortex anodal-tDCS in mice and humans<sup>114</sup>. Plastic enhancement of motor skill learning  
13 via anodal-tDCS, however, is reduced in Met allele carriers<sup>114</sup>. In this supplementary analysis, we  
14 tested whether BDNF polymorphism type moderates the state-dependent effect of anodal-tDCS on  
15 after-effect retention. Identification of individual predictors of responsiveness to stimulation is cru-  
16 cial for both the mechanistic understanding of the effect of tDCS and the tailoring of interventions  
17 on an individual basis. Genotyping was acquired for 24/25 participants in Exp. 2. Genomic DNA  
18 was extracted from buccal cells using the ChargeSwitch® gDNA Buccal Cell Kit (ThermoFisher  
19 Scientific, UK) and samples were genotyped in duplicate by LGC Genomics (LGC Group, UK).  
20 Rs6265 was the only polymorphism examined.

1 In agreement with the known allele distribution in the Caucasian population<sup>119</sup>, 5/24 partic-  
2 ipants (21% of our sample) carried the Met allele. BDNF polymorphism had no significant influ-  
3 ence on the effect of a-tDCS on either short-term ( $\text{BDNF} \times \text{stim} \times \text{trial} = -0.001$ , 95% CI  $[-0.014, 0.012]$ ,  
4  $t_{(2141)} = -0.206$ ,  $p = 0.84$ ), Fig. S3) or long-term retention ( $\text{BDNF} \times \text{stim} \times \text{trial} = -0.01$ ,  
5 95% CI  $[-0.02, 0.002]$ ,  $t_{(2141)} = -1.61$ ,  $p = 0.11$ ), Fig. S3). This does not support the hy-  
6 pothesis that augmentation of BDNF-dependent synaptic plasticity is a contributory mechanism  
7 mediating behavioural plasticity induction via sensorimotor cortex anodal tDCS.

## 1 Supplementary Figures

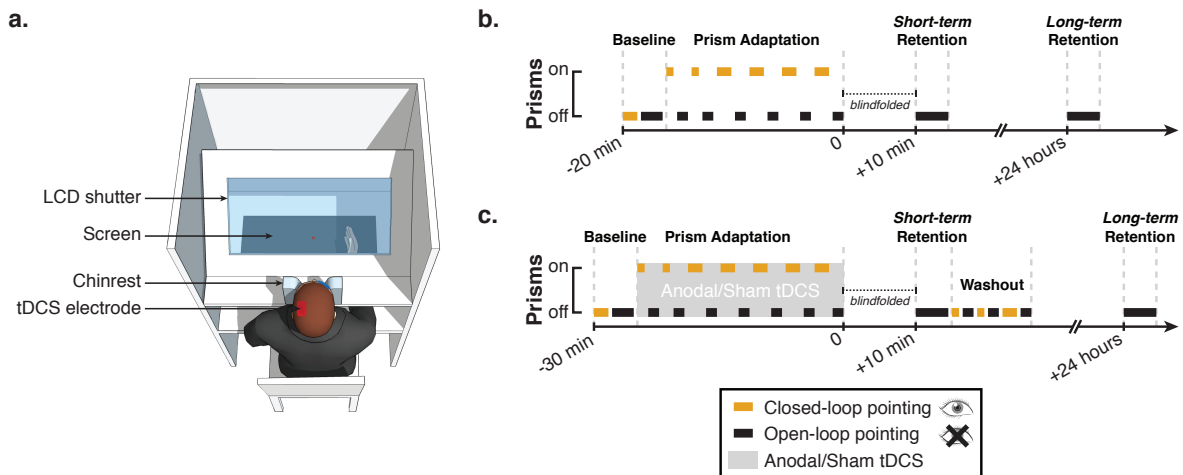

Figure S1: **Prism adaptation protocol.** **a. Experimental setup.** For both Experiment 1 and 2, participants sat in a chinrest viewing a horizontal 32-inch touchscreen through a liquid crystal shutter. The touchscreen was used to present visual targets and record reach endpoints. The liquid crystal display shutter was used to control visual feedback by turning opaque during reaching movements to conceal endpoint performance. **b. Procedure for Experiment 1.** Baseline accuracy was measured without prisms during blocks of closed-loop (continuous visual feedback) and open-loop (no visual feedback) pointing. During adaptation, participants alternated between blocks of prism exposure (closed-loop, glasses on) and after-effect measurement (open-loop, prisms off). Retention of the after-effect was measured 10 minutes and 24 hours post-adaptation. **c. Procedure for Experiment 2.** The procedure for Experiment 2 was the same as Experiment 1, except that left M1 anodal tDCS (real/sham) was applied throughout adaptation (grey shading). Short-term retention was followed by washout, during which participants observed and corrected their leftward errors (closed-loop pointing blocks, no prisms), interleaved with open-loop measures to confirm after-effect decay back to baseline.

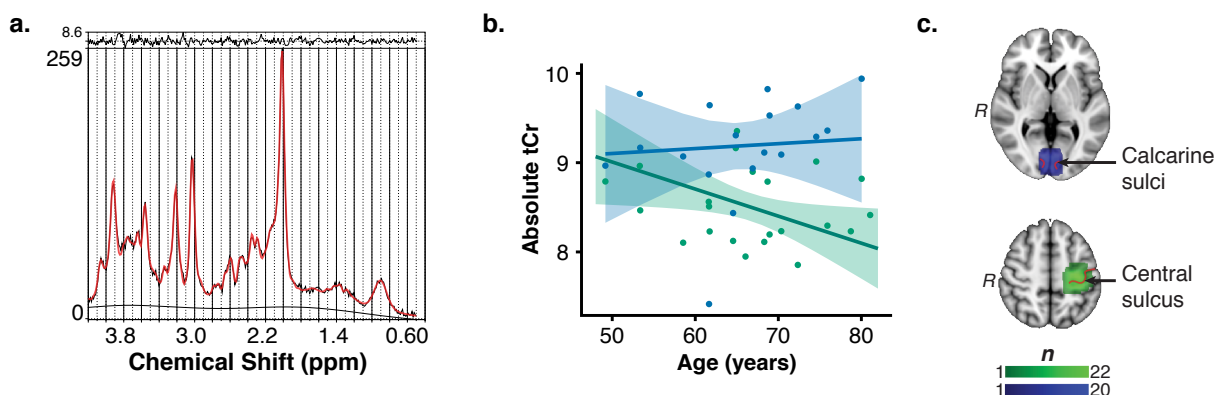

Figure S2: **Magnetic resonance spectroscopy data quality.** This figure shows the quality of MRS data collected for experiment 1. **a.** Example raw MRS spectrum and LCMoDel fit from one participant. The fitted LCMoDel (in red) is plotted overlaid on the raw data (in black). The difference between the data and model (residuals) is shown at the top and the baseline is shown at the bottom. **b.** This panel presents the association between age and total Creatine (tCr), controlling for the fraction of WM and GM, in the M1 voxel (in green) and the V1 voxel (in blue). Shading indicate 95% confidence intervals. This panel shows that tCr estimate was negatively correlated with age in M1, but not in V1. Because of this relationship, we use absolute concentrations of GABA and Glx through the paper, rather than using tCr for internal referencing. **c.** Magnetic resonance spectroscopy voxels group overlap map. The M1 voxel was centred on the left central sulcus in 22 participants (in green, MNI coordinate  $z = 52$ ). The control V1 voxel was centred on the bilateral calcarine sulcus in 20 participants (in blue, MNI coordinate  $z = 2$ ). Colour bar represents the degree of overlap. All images are displayed in radiological convention (i.e. left side of the image corresponds to the right side of the brain).

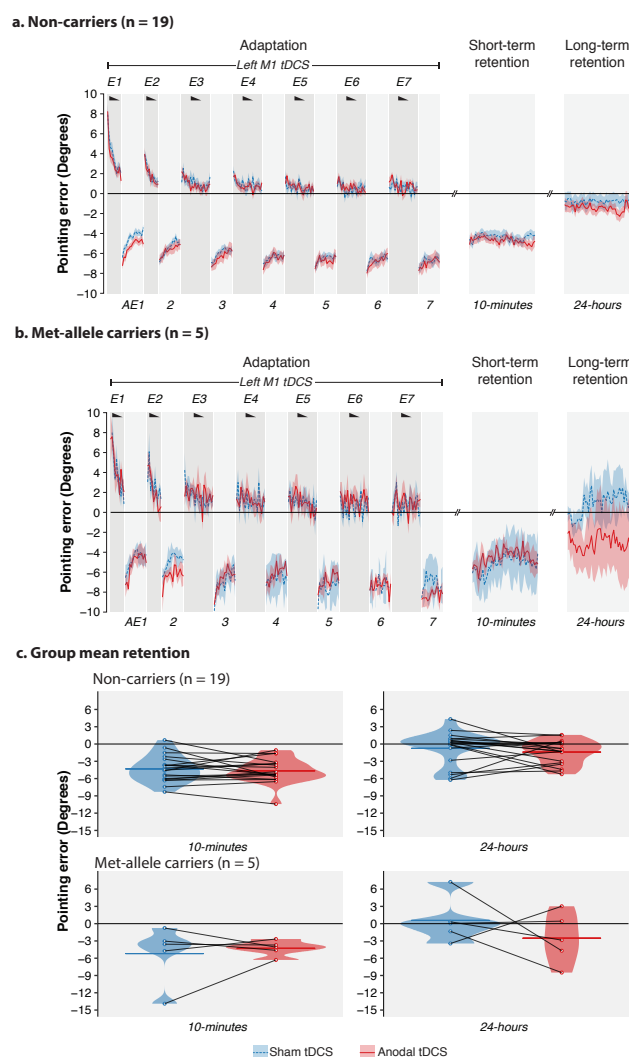

**Figure S3: The BDNF Val66Met polymorphism does not influence the effect of anodal tDCS on retention.** Here, we investigated the relationship between BDNF genotype and retention as a function of a-tDCS condition. **a.** Prism adaptation pointing behaviour is plotted for non-carriers. **b** Prism adaptation pointing behaviour is plotted for Met-allele carriers. **c.** Mean short-term (10-min) and long-term (24-hour) retention is plotted for non-carrier and Met-allele carriers. Pointing performance are normalised by the baseline (pre-exposure) accuracy. We used linear mixed models to examine whether BDNF polymorphism influenced the effect of a-tDCS on short-term (10min) and long-term (24hr) retention. BDNF polymorphism did not influence short (BDNF  $\times$  a-tDCS:  $t_{(2141)} = 1.00, p = 0.320$ ) or long-term retention (BDNF  $\times$  a-tDCS:  $t_{(2141)} = -1.61, p = 0.107$ ).



## 1 **Supplementary Tables**

| Participant | Age  | Experiment 1      |            | Experiment 2            |
|-------------|------|-------------------|------------|-------------------------|
|             |      | <i>PA session</i> | <i>MRS</i> | <i>PA+tDCS sessions</i> |
| 1           | 81.1 | ✓                 | (✓)        | ✓                       |
| 2           | 78.7 | ✓                 | (✓)        | ✓                       |
| 3           | 80.0 | ✓                 | ✓          | ✓                       |
| 4           | 75.9 | ✓                 | ✓          | ✓                       |
| 5           | 74.6 | ✓                 | ✓          | ✓                       |
| 6           | 72.3 | ✓                 | ✓          | ✓                       |
| 7           | 68.7 | ✓                 | ✓          | ✓                       |
| 8           | 66.9 | ✓                 | ✓          | ✓                       |
| 9           | 64.6 | ✓                 | ✓          |                         |
| 10          | 53.3 | ✓                 | ✓          |                         |
| 11          | 68.9 | ✓                 | ✓          | ✓                       |
| 12          | 80.7 | ✓                 |            | ✓                       |
| 13          | 70.4 | ✓                 | ✓          | ✓                       |
| 14          | 66.0 | ✓                 | ✓          |                         |
| 15          | 61.7 | ✓                 | ✓          | ✓                       |
| 16          | 68.3 | ✓                 | ✓          |                         |
| 17          | 58.5 | ✓                 | ✓          | ✓                       |
| 18          | 53.4 | ✓                 |            |                         |
| 19          | 64.9 | ✓                 | ✓          |                         |
| 20          | 61.7 | ✓                 | ✓          | ✓                       |
| 21          | 49.2 | ✓                 | ✓          |                         |
| 22          | 61.6 | ✓                 | ✓          | ✓                       |
| 23          | 65.0 | ✓                 | ✓          | ✓                       |
| 24          | 65.6 | ✓                 | ✓          | ✓                       |
| 25          | 75.4 | ✓                 |            | ✓                       |
| 26          | 74.1 | ✓                 |            | ✓                       |
| 27          | 67.8 | ✓                 |            | ✓                       |
| 28          | 65.2 | ✓                 |            | ✓                       |
| 29          | 55.4 | ✓                 |            | ✓                       |
| 30          | 67.4 | ✓                 |            | ✓                       |
| 31          | 70.3 | ✓                 |            | ✓                       |
| 32          | 70.9 | ✓                 |            | ✓                       |

Table S1: **Participant demographics and inclusion details.** Experiment 1 included a behavioural experiment (prism adaptation, PA; with retention probe the next day) and a MR Spectroscopy scan. Experiment 2 included two PA sessions with retention probe 24 hours later, separated by a week. Inclusion of participants in every part of the experiments is indicated by a tick. In the MRS column, parentheses indicate incomplete data due to technical difficulties (missing control voxel).

59

|                     | <i>Dependent variable:</i>  |                           |                         |                          |
|---------------------|-----------------------------|---------------------------|-------------------------|--------------------------|
|                     | Normalised angular error    |                           |                         |                          |
|                     | Closed-loop pointing<br>(1) | Open-loop pointing<br>(2) | 10-min retention<br>(3) | 24-hour retention<br>(4) |
| Intercept           | 1.06*** (0.84, 1.27)        | -6.66*** (-7.43, -5.89)   | -4.61*** (-5.40, -3.81) | -1.30*** (-2.23, -0.37)  |
| Trial               | -0.08*** (-0.10, -0.07)     | 0.14*** (0.11, 0.17)      | 0.01 (-0.01, 0.03)      | 0.002 (-0.02, 0.02)      |
| Block               | -0.42*** (-0.51, -0.33)     | -0.36*** (-0.55, -0.18)   |                         |                          |
| Trial:Block         | 0.05*** (0.04, 0.06)        | -0.02*** (-0.03, -0.01)   |                         |                          |
| Observations        | 3,200                       | 2,880                     | 1,440                   | 1,440                    |
| Bayesian Inf. Crit. | 13,771.00                   | 10,153.74                 | 5,183.54                | 4,949.39                 |

Table S2: **Experiment 1: Prism adaptation behaviour.** All LMMs use the normalised pointing error as the dependent variable (i.e. error *minus* baseline error). Model (1) assesses the reduction of CLP errors throughout prism exposure (blocks E1-6), while model (2) captures the development of an after-effect on OLP trials (blocks AE1-6). Models (3) and (4) assess the persistence (intercept) and stability (main effect of Trial) of the after-effect (OLP) 10-minutes and 24-hours after PA. \* $p < 0.1$ ; \*\* $p < 0.05$ ; \*\*\* $p < 0.01$  (all two-tailed).

|                     | Dependent variable:     |                         |                          |                                                              |                                               |                                          |
|---------------------|-------------------------|-------------------------|--------------------------|--------------------------------------------------------------|-----------------------------------------------|------------------------------------------|
|                     | End of PA<br>(1)        | 10-min retention<br>(2) | 24-hour retention<br>(3) | Normalised angular error<br>24-hour retention [c:AE6]<br>(4) | 24-hour retention [controlling:10-min]<br>(5) | 24-hour retention [c:mvtDuration]<br>(6) |
| Intercept           | -7.36*** (-8.46, -6.26) | -4.61*** (-5.39, -3.82) | -1.30*** (-2.16, -0.44)  | -1.30*** (-2.16, -0.44)                                      | -1.30*** (-2.16, -0.44)                       | -0.07 (-3.36, 3.21)                      |
| Trial               | 0.10*** (0.07, 0.14)    | 0.01 (-0.01, 0.03)      | 0.002 (-0.02, 0.02)      | 0.002 (-0.02, 0.02)                                          | 0.002 (-0.02, 0.02)                           | 0.002 (-0.02, 0.02)                      |
| Age                 | 0.03 (-0.11, 0.17)      | 0.05 (-0.05, 0.15)      | -0.12** (-0.23, -0.02)   | -0.13** (-0.24, -0.02)                                       | -0.13** (-0.24, -0.02)                        | -0.12** (-0.23, -0.01)                   |
| Age:Trial           | 0.0005 (-0.004, 0.01)   | 0.002* (-0.0003, 0.004) | 0.001 (-0.002, 0.004)    | 0.001 (-0.002, 0.004)                                        | 0.001 (-0.002, 0.004)                         | 0.001 (-0.002, 0.004)                    |
| mean AE (end of PA) |                         |                         |                          | 0.11 (-0.14, 0.37)                                           |                                               |                                          |
| mean AE (10-min)    |                         |                         |                          |                                                              | 0.03 (-0.33, 0.40)                            |                                          |
| Movement duration   |                         |                         |                          |                                                              |                                               | -0.003 (-0.01, 0.004)                    |
| Observations        | 480                     | 1,440                   | 1,440                    | 1,440                                                        | 1,440                                         | 1,440                                    |
| Bayesian Inf. Crit. | 1,730.39                | 5,194.85                | 4,957.99                 | 4,964.52                                                     | 4,965.23                                      | 4,964.71                                 |

**Table S3: Experiment 1: Older participants show a more persistent prism after-effect.** The LMMs reported in this table examine the relationship between age and prism adaptation memory. They all use normalised OLP error as the dependent variable (i.e. error *minus* baseline error). Models (1), (2) and (3) examine the relationship between age and prism after-effect at the end of adaptation (block AE6), and at the 10-minutes and 24-hour retention time points respectively. Only 24-hours retention behaviour was related to age, such that older participants showed a larger (more negative) AE. The next three models assess the robustness of this result when controlling for the average AE at the end of the adaptation (model 4), the average AE at the 10-minutes retention block (model 5), and the average movement duration on CLP trials during prism exposure (model 6). The relationship between age and long-term adaptation memory survived controlling for all three factors, confirming that it was not an artefact of older participants adapting to a greater extent on the first day or pointing more slowly. \* $p < 0.1$ ; \*\* $p < 0.05$ ; \*\*\* $p < 0.01$  (all two-tailed).

|                         | <i>Dependent variable:</i> |                         |                        |                     |                      |                         |
|-------------------------|----------------------------|-------------------------|------------------------|---------------------|----------------------|-------------------------|
|                         | M1 E:I<br>(1)              | M1 GABA<br>(2)          | M1 Glx<br>(3)          | V1 E:I<br>(4)       | V1 GABA<br>(5)       | V1 Glx<br>(6)           |
| Intercept               | -0.00 (-0.41, 0.41)        | 0.00 (-0.14, 0.14)      | 0.00 (-0.39, 0.39)     | -0.22 (-0.73, 0.30) | 0.08 (-0.12, 0.27)   | -0.34** (-0.63, -0.05)  |
| Age                     | 0.08* (0.005, 0.15)        | -0.03** (-0.06, -0.01)  | -0.03 (-0.11, 0.05)    | 0.05 (-0.02, 0.12)  | -0.02 (-0.04, 0.004) | 0.005 (-0.04, 0.05)     |
| Glx                     |                            | 0.04 (-0.13, 0.21)      |                        |                     | 0.28* (0.003, 0.56)  |                         |
| GABA                    |                            |                         | 0.31 (-0.98, 1.61)     |                     |                      | 0.93* (0.01, 1.85)      |
| GM                      | 0.15 (-0.04, 0.34)         | -0.07* (-0.14, -0.0003) | -0.07 (-0.27, 0.13)    | -0.10 (-0.24, 0.05) | 0.05* (-0.003, 0.10) | -0.12** (-0.20, -0.03)  |
| WM                      | 0.04 (-0.05, 0.13)         | -0.03 (-0.07, 0.01)     | -0.12** (-0.22, -0.03) | -0.11 (-0.24, 0.02) | 0.06 (-0.01, 0.14)   | -0.22*** (-0.29, -0.15) |
| Observations            | 22                         | 22                      | 22                     | 16                  | 16                   | 16                      |
| Adjusted R <sup>2</sup> | 0.06                       | 0.20                    | 0.25                   | 0.40                | 0.48                 | 0.77                    |

61

**Table S4: Experiment 1: Older participants have a higher excitation:inhibition ratio in sensorimotor cortex.** The linear regressions reported in this table examine the relationship between age and metabolite concentration within the motor (labelled “M1”) and occipital (labelled “V1”) cortex voxels. All models controlled for the fraction of grey and white matter within the MRS voxel, and included the MRS measure as the dependent variable. Model (1) shows the predicted significant positive relationship between age and E:I ratio (Glx:GABA). Models (2) and (3) decompose this relationship into its GABA and Glx constituents respectively. They highlight that the age-related increase in E:I was mainly due to a loss of inhibition. The final three models show a qualitatively similar, though not significant, pattern within the bilateral occipital cortex. \*p<0.1; \*\*p<0.05; \*\*\*p<0.01 (all two-tailed).

|                     | <i>Dependent variable:</i> |                        |                               |                                        |                      |                        |                               |                                        |
|---------------------|----------------------------|------------------------|-------------------------------|----------------------------------------|----------------------|------------------------|-------------------------------|----------------------------------------|
|                     | Normalised angular error   |                        |                               |                                        |                      |                        |                               |                                        |
|                     | M1 E:I<br>(1)              | M1 GABA and Glx<br>(2) | M1 E:I [c:mvtDuration]<br>(3) | M1 GABA and Glx [c:mvtDuration]<br>(4) | V1 E:I<br>(5)        | V1 GABA and Glx<br>(6) | V1 E:I [c:mvtDuration]<br>(7) | V1 GABA and Glx [c:mvtDuration]<br>(8) |
| Intercept           | -0.79** (-1.53, -0.05)     | -0.79** (-1.56, -0.03) | 2.73 (-1.41, 6.87)            | 1.51 (-2.86, 5.87)                     | -0.44 (-2.07, 1.20)  | 0.08 (-1.75, 1.91)     | 10.95*** (4.23, 17.67)        | 11.12*** (4.14, 18.11)                 |
| Trial               | 0.01 (-0.03, 0.04)         | 0.01 (-0.03, 0.04)     | 0.01 (-0.03, 0.04)            | 0.01 (-0.03, 0.04)                     | -0.001 (-0.04, 0.04) | -0.003 (-0.04, 0.04)   | -0.001 (-0.04, 0.04)          | -0.003 (-0.04, 0.04)                   |
| EI                  | -2.07*** (-2.82, -1.32)    |                        | -2.07*** (-2.77, -1.37)       |                                        | 0.21 (-1.41, 1.82)   |                        | 1.02 (-0.35, 2.39)            |                                        |
| GABA                |                            | 5.59*** (3.42, 7.76)   |                               | 5.58*** (3.49, 7.67)                   |                      | -1.51 (-6.62, 3.60)    |                               | -3.32 (-7.63, 0.99)                    |
| Glx                 |                            | 0.003 (-0.87, 0.88)    |                               | -0.15 (-1.04, 0.74)                    |                      | 1.70 (-1.24, 4.63)     |                               | 0.48 (-1.97, 2.94)                     |
| GM                  | 0.24** (0.03, 0.45)        | 0.29*** (0.09, 0.50)   | 0.15 (-0.07, 0.37)            | 0.23** (0.01, 0.45)                    | 0.28 (-0.11, 0.67)   | 0.44* (-0.05, 0.94)    | 0.20 (-0.10, 0.50)            | 0.23 (-0.17, 0.64)                     |
| WM                  | -0.01 (-0.15, 0.12)        | 0.11 (-0.05, 0.27)     | -0.03 (-0.16, 0.10)           | 0.08 (-0.08, 0.24)                     | 0.30 (-0.08, 0.69)   | 0.65* (-0.06, 1.36)    | 0.18 (-0.12, 0.48)            | 0.18 (-0.45, 0.80)                     |
| Trial:EI            | -0.01 (-0.04, 0.02)        |                        | -0.01 (-0.04, 0.02)           |                                        | 0.01 (-0.02, 0.05)   |                        | 0.01 (-0.02, 0.05)            |                                        |
| Trial:GABA          |                            | 0.01 (-0.08, 0.10)     |                               | 0.01 (-0.08, 0.10)                     |                      | -0.03 (-0.13, 0.08)    |                               | -0.03 (-0.13, 0.08)                    |
| Trial:Glx           |                            | -0.004 (-0.03, 0.03)   |                               | -0.004 (-0.03, 0.03)                   |                      | 0.01 (-0.03, 0.05)     |                               | 0.01 (-0.03, 0.05)                     |
| Movement duration   |                            |                        | -0.01* (-0.02, 0.001)         | -0.01 (-0.02, 0.01)                    |                      |                        | -0.03*** (-0.05, -0.01)       | -0.03*** (-0.05, -0.01)                |
| Observations        | 990                        | 990                    | 990                           | 990                                    | 720                  | 720                    | 720                           | 720                                    |
| Bayesian Inf. Crit. | 3,359.62                   | 3,371.64               | 3,363.89                      | 3,377.51                               | 2,479.94             | 2,491.97               | 2,477.90                      | 2,490.77                               |

62

**Table S5: Experiment 1: Higher sensorimotor cortex excitation:inhibition ratio is associated with greater 24-hour retention.** The LMMs reported in this table examine the relationship between M1 and V1 neurochemistry and the magnitude of the AE at 24-hours. All models controlled for the fraction of grey and white matter within the MRS voxel. Model (1) shows that individuals with higher M1 E:I had a larger (more negative) AE at 24-hour. Model (2) decomposes this relationship into its GABA and Glx constituents respectively, highlighting that GABA but not Glx drives the previous relationship. Models (3) and (4) show that these findings were robust to controlling for the average movement duration on CLP trials during prism exposure. Finally, models (5) to (8) reproduce the same set of analyses using MRS data from the anatomical control voxel (V1). No relationship between neurochemistry and long-term adaptation memory was observed in the V1 voxel. \* $p < 0.1$ ; \*\* $p < 0.05$ ; \*\*\* $p < 0.01$  (all two-tailed).

|                          | <i>Dependent variable:</i>     |                                 |                                |                    |                      |                      |
|--------------------------|--------------------------------|---------------------------------|--------------------------------|--------------------|----------------------|----------------------|
|                          | M <sub>1</sub> (M1 E:I)<br>(1) | M <sub>2</sub> (M1 GABA)<br>(2) | M <sub>3</sub> (M1 Glx)<br>(3) | (4)                | Y (AE24hrs)<br>(5)   | (6)                  |
| X (age)                  | 0.66* (0.31)                   | -0.78** (0.28)                  | -0.31 (0.27)                   | -0.76** (0.29)     | -0.35 (0.24)         | -0.28 (0.28)         |
| M <sub>1</sub> (M1 E:I)  |                                |                                 |                                |                    | -0.63*** (0.16)      |                      |
| M <sub>2</sub> (M1 GABA) |                                |                                 |                                |                    |                      | 0.65*** (0.20)       |
| M <sub>3</sub> (M1 Glx)  |                                |                                 |                                |                    |                      | -0.06 (0.20)         |
| C <sub>1</sub> (GM)      | 0.54 (0.35)                    | -0.68** (0.31)                  | -0.31 (0.30)                   | -0.40 (0.32)       | -0.07 (0.25)         | 0.02 (0.29)          |
| C <sub>2</sub> (WM)      | 0.20 (0.26)                    | -0.53** (0.23)                  | -0.70*** (0.22)                | -0.32 (0.23)       | -0.19 (0.18)         | -0.01 (0.25)         |
| Observations             | 22                             | 22                              | 22                             | 22                 | 22                   | 22                   |
| Adjusted R <sup>2</sup>  | 0.06                           | 0.24                            | 0.28                           | 0.22               | 0.56                 | 0.48                 |
| F Statistic              | 1.46 (df = 3; 18)              | 3.16* (df = 3; 18)              | 3.72** (df = 3; 18)            | 2.99* (df = 3; 18) | 7.81*** (df = 4; 17) | 4.88*** (df = 5; 16) |

63

**Table S6: Experiment 1: Motor cortical GABA mediates the relationship between age and long-term adaptation memory.**

Model (1) shows a near-significant relationship between age and motor cortical E:I ( $p = 0.051$ , two-tailed;  $p = 0.025$ , one-tailed). Models (2) and (3) show that this relationship is driven by GABA ( $p = 0.013$ ) and not Glx ( $p = 0.27$ ). Model (4) shows that older age is associated with greater 24-hour retention ( $p = 0.02$ ). Crucially, model (5) demonstrates that the association between age and 24-hour retention is no longer significant when accounting for M1 E:I. Further, model (6) shows that the mediation is specifically driven by GABA ( $p = 0.004$ ) and not Glx ( $p = 0.78$ ). Overall, these regression models provide support in favour of M1 GABA mediating the relationship between age and long-term retention, which was subsequently assessed formally. The results indicate a significant mediating effect of M1 GABA ( $ab_1 = -0.50$ , 95%*CI* :  $[-1.36, -0.14]$ ,  $p = 0.01$ ) but not M1 Glx ( $ab_2 = 0.02$ , 95%*CI* :  $[-0.09, 0.31]$ ,  $p = 0.73$ ; see Fig. 4). \* $p < 0.1$ ; \*\* $p < 0.05$ ; \*\*\* $p < 0.01$  (all two-tailed).

|                               | <i>Dependent variable:</i>     |                                 |                                |                    |                      |                     |
|-------------------------------|--------------------------------|---------------------------------|--------------------------------|--------------------|----------------------|---------------------|
|                               | M <sub>1</sub> (M1 E:l)<br>(1) | M <sub>2</sub> (M1 GABA)<br>(2) | M <sub>3</sub> (M1 Glx)<br>(3) | (4)                | Y (AE24hrs)<br>(5)   | (6)                 |
| X (age)                       | 0.66* (0.31)                   | -0.78** (0.28)                  | -0.31 (0.27)                   | -0.68** (0.29)     | -0.34 (0.24)         | -0.28 (0.29)        |
| M <sub>1</sub> (M1 E:l)       |                                |                                 |                                |                    | -0.60*** (0.17)      |                     |
| M <sub>2</sub> (M1 GABA)      |                                |                                 |                                |                    |                      | 0.66** (0.23)       |
| M <sub>3</sub> (M1 Glx)       |                                |                                 |                                |                    |                      | -0.05 (0.21)        |
| C <sub>1</sub> (GM)           | 0.54 (0.35)                    | -0.68** (0.31)                  | -0.31 (0.30)                   | -0.31 (0.32)       | -0.04 (0.26)         | 0.02 (0.30)         |
| C <sub>2</sub> (WM)           | 0.20 (0.26)                    | -0.53** (0.23)                  | -0.70*** (0.22)                | -0.27 (0.23)       | -0.18 (0.18)         | -0.01 (0.27)        |
| C <sub>3</sub> (Mvt duration) |                                |                                 |                                | -0.23 (0.20)       | -0.09 (0.16)         | 0.02 (0.20)         |
| Observations                  | 22                             | 22                              | 22                             | 22                 | 22                   | 22                  |
| Adjusted R <sup>2</sup>       | 0.06                           | 0.24                            | 0.28                           | 0.24               | 0.55                 | 0.45                |
| F Statistic                   | 1.46 (df = 3; 18)              | 3.16* (df = 3; 18)              | 3.72** (df = 3; 18)            | 2.63* (df = 4; 17) | 6.08*** (df = 5; 16) | 3.81** (df = 6; 15) |

**Table S7: Experiment 1: Mediation analysis controlling for average CLP duration.** This table presents the results of the mediation analysis, controlling for the average reaching movement duration on CLP trials during prism exposure. Overall, this table indicates that the results presented in Table S6 persist: M1 GABA, but not Glx, mediates the relationship between age and 24-hour retention. \*p<0.1; \*\*p<0.05; \*\*\*p<0.01 (all two-tailed).



65

|                     | Dependent variable:      |                          |                                |                       |                          |                                |
|---------------------|--------------------------|--------------------------|--------------------------------|-----------------------|--------------------------|--------------------------------|
|                     | Normalised angular error |                          |                                |                       |                          |                                |
|                     | a-tDCS:10min<br>(1)      | a-tDCS:EI (10min)<br>(2) | a-tDCS:GABA/Glx (10min)<br>(3) | a-tDCS:24-hour<br>(4) | a-tDCS:EI (24hrs)<br>(5) | a-tDCS:GABA/Glx (24hrs)<br>(6) |
| Intercept           | -4.7*** (-5.5, -3.8)     | -5.0*** (-6.1, -4.0)     | -5.0*** (-6.1, -4.0)           | -1.0** (-1.8, -0.2)   | -1.1*** (-1.7, -0.4)     | -1.1*** (-1.7, -0.5)           |
| Trial               | -0.003 (-0.02, 0.01)     | 0.003 (-0.02, 0.02)      | 0.003 (-0.02, 0.02)            | -0.001 (-0.02, 0.02)  | -0.001 (-0.03, 0.03)     | -0.001 (-0.03, 0.03)           |
| GM                  |                          | 0.1 (-0.1, 0.3)          | 0.1 (-0.1, 0.3)                |                       | 0.2*** (0.1, 0.4)        | 0.2*** (0.1, 0.4)              |
| WM                  |                          | -0.1 (-0.2, 0.04)        | -0.04 (-0.2, 0.1)              |                       | 0.1 (-0.05, 0.2)         | 0.1 (-0.1, 0.2)                |
| a-tDCS              | 0.1 (-0.5, 0.6)          | 0.1 (-0.5, 0.7)          | 0.1 (-0.5, 0.7)                | -0.5 (-1.3, 0.2)      | 0.04 (-0.6, 0.7)         | 0.04 (-0.6, 0.7)               |
| E:I                 |                          | -0.4 (-1.5, 0.6)         |                                |                       | -0.9*** (-1.5, -0.3)     |                                |
| GABA                |                          |                          | 0.6 (-2.4, 3.6)                |                       |                          | 2.8*** (1.0, 4.6)              |
| Glx                 |                          |                          | -0.1 (-1.2, 1.0)               |                       |                          | -0.3 (-1.0, 0.5)               |
| Trial:a-tDCS        | -0.01 (-0.02, 0.01)      | 0.000 (-0.01, 0.01)      | 0.000 (-0.01, 0.01)            | -0.01 (-0.02, 0.005)  | -0.01 (-0.02, 0.01)      | -0.01 (-0.02, 0.01)            |
| Trial:EI            |                          | 0.01 (-0.01, 0.03)       |                                |                       | 0.02 (-0.01, 0.05)       |                                |
| Trial:GABA          |                          |                          | -0.03 (-0.1, 0.03)             |                       |                          | -0.04 (-0.1, 0.04)             |
| Trial:Glx           |                          |                          | 0.01 (-0.01, 0.03)             |                       |                          | 0.004 (-0.02, 0.03)            |
| a-tDCS:EI           |                          | 0.6* (-0.03, 1.2)        |                                |                       | 0.8** (0.1, 1.4)         |                                |
| a-tDCS:GABA         |                          |                          | -1.2 (-3.0, 0.6)               |                       |                          | -1.5* (-3.3, 0.2)              |
| a-tDCS:Glx          |                          |                          | 0.3 (-0.3, 0.8)                |                       |                          | 0.7** (0.2, 1.3)               |
| Trial:a-tDCS:EI     |                          | 0.01 (-0.01, 0.02)       |                                |                       | 0.01** (0.002, 0.02)     |                                |
| Trial:a-tDCS:GABA   |                          |                          | -0.01 (-0.1, 0.03)             |                       |                          | -0.03 (-0.1, 0.01)             |
| Trial:a-tDCS:Glx    |                          |                          | 0.01 (-0.003, 0.02)            |                       |                          | 0.004 (-0.01, 0.01)            |
| Observations        | 2,250                    | 1,440                    | 1,440                          | 2,250                 | 1,440                    | 1,440                          |
| Bayesian Inf. Crit. | 7,470.8                  | 4,830.3                  | 4,858.5                        | 8,378.3               | 5,400.6                  | 5,425.6                        |

Note:

\*p<0.1; \*\*p<0.05; \*\*\*p<0.01

**Table S8: Experiment 2: Association between a-tDCS, M1 neurochemistry, and adaptation memory.** All linear mixed-effect models use the normalised pointing error (at 10-min or 24-hours post-PA) as the dependent variable. Model (1) assesses the effect of left M1 anodal tDCS on the after-effect at 10-min. Model (2) assesses the interaction of left M1 E:I (Glx:GABA) with this effect. Model (3) decomposes the individual interaction of GABA and Glx with the behavioural effect of a-tDCS effect on short-term retention. Models (4), (5), (6) assess the same effects at the long-term retention time point (24-hours). The most important finding here is that M1 E:I significantly interacted with the effect of a-tDCS on long-term retention (a-tDCS:EI in Model 5), which could be decomposed into opposite interactions with GABA and Glx (a-tDCS:GABA and a-tDCS:Glx in Model 6). All models including MRS data also controlled for the fraction of grey and white matter within the voxel. \*p<0.1; \*\*p<0.05; \*\*\*p<0.01 (all two-tailed).

99

|                     | <i>Dependent variable:</i> |                                |                          |                                |
|---------------------|----------------------------|--------------------------------|--------------------------|--------------------------------|
|                     | Normalised angular error   |                                |                          |                                |
|                     | a-tDCS:EI (10min)<br>(1)   | a-tDCS:GABA/Glx (10min)<br>(2) | a-tDCS:EI (24hrs)<br>(3) | a-tDCS:GABA/Glx (24hrs)<br>(4) |
| Intercept           | -1.9 (-7.6, 3.8)           | -1.9 (-9.4, 5.6)               | -4.3* (-9.0, 0.4)        | -7.4** (-13.1, -1.7)           |
| Trial               | 0.003 (-0.02, 0.02)        | 0.003 (-0.02, 0.02)            | -0.001 (-0.03, 0.03)     | -0.001 (-0.03, 0.03)           |
| Mvt Duration        | -0.01 (-0.02, 0.005)       | -0.01 (-0.02, 0.01)            | 0.01 (-0.003, 0.01)      | 0.01** (0.001, 0.02)           |
| GM                  | 0.01 (-0.2, 0.3)           | 0.01 (-0.3, 0.3)               | 0.3*** (0.1, 0.5)        | 0.4*** (0.2, 0.6)              |
| WM                  | -0.1* (-0.2, 0.02)         | -0.1 (-0.3, 0.1)               | 0.1 (-0.03, 0.2)         | 0.1* (-0.01, 0.3)              |
| a-tDCS              | 0.1 (-0.5, 0.7)            | 0.1 (-0.5, 0.7)                | 0.04 (-0.6, 0.7)         | 0.04 (-0.6, 0.7)               |
| EI                  | -0.3 (-1.3, 0.7)           |                                | -1.0*** (-1.7, -0.4)     |                                |
| GABA                |                            | 0.2 (-2.9, 3.2)                |                          | 3.6*** (1.7, 5.6)              |
| Glx                 |                            | -0.4 (-1.6, 0.8)               |                          | 0.2 (-0.7, 1.0)                |
| Trial:a-tDCS        | 0.000 (-0.01, 0.01)        | 0.000 (-0.01, 0.01)            | -0.01 (-0.02, 0.01)      | -0.01 (-0.02, 0.01)            |
| Trial:EI            | 0.01 (-0.01, 0.03)         |                                | 0.02 (-0.01, 0.05)       |                                |
| Trial:GABA          |                            | -0.03 (-0.1, 0.03)             |                          | -0.04 (-0.1, 0.04)             |
| Trial:Glx           |                            | 0.01 (-0.01, 0.03)             |                          | 0.004 (-0.02, 0.03)            |
| a-tDCS:EI           | 0.6* (-0.03, 1.2)          |                                | 0.8** (0.1, 1.4)         |                                |
| a-tDCS:GABA         |                            | -1.2 (-3.0, 0.6)               |                          | -1.5* (-3.3, 0.2)              |
| a-tDCS:Glx          |                            | 0.3 (-0.3, 0.8)                |                          | 0.7** (0.2, 1.3)               |
| Trial:a-tDCS:EI     | 0.01 (-0.01, 0.02)         |                                | 0.01** (0.002, 0.02)     |                                |
| Trial:a-tDCS:GABA   |                            | -0.01 (-0.1, 0.03)             |                          | -0.03 (-0.1, 0.01)             |
| Trial:a-tDCS:Glx    |                            | 0.01 (-0.003, 0.02)            |                          | 0.004 (-0.01, 0.01)            |
| Observations        | 1,440                      | 1,440                          | 1,440                    | 1,440                          |
| Bayesian Inf. Crit. | 4,836.5                    | 4,865.2                        | 5,406.9                  | 5,430.6                        |

Note:

\*p<0.1; \*\*p<0.05; \*\*\*p<0.01

**Table S9: Experiment 2: Association between a-tDCS, M1 neurochemistry, and adaptation memory while controlling for average movement speed during prism exposure.** All linear mixed-effect models use the normalised pointing error (at 10-min or 24-hours post-PA) as the dependent variable, and control for the average movement duration of the CLP trials of the prism exposure. Model (1) assesses the modulation influence of left M1 E:I (Glx:GABA) on the behavioural effect of a-tDCS on the AE at 10-minutes. Model (2) decomposes the individual interaction of GABA and Glx with the behavioural effect of a-tDCS effect on short-term retention. Models (4) and (5) assess the same effects at the long-term retention time point (24-hours). There was no significant interaction between a-tDCS and E:I at any of the two retention time points. All models also controlled for the fraction of grey and white matter within the voxel. \*p<0.1; \*\*p<0.05; \*\*\*p<0.01 (all two-tailed).

|                     | <i>Dependent variable:</i> |                         |                      |                         |
|---------------------|----------------------------|-------------------------|----------------------|-------------------------|
|                     | Normalised angular error   |                         |                      |                         |
|                     | a-tDCS:EI (10min)          | a-tDCS:GABA/Glx (10min) | a-tDCS:EI (24hrs)    | a-tDCS:GABA/Glx (24hrs) |
|                     | (1)                        | (2)                     | (3)                  | (4)                     |
| Intercept           | -4.1*** (-5.4, -2.8)       | -3.3*** (-4.7, -1.9)    | -2.0*** (-3.2, -0.9) | -1.3** (-2.4, -0.2)     |
| Trial               | 0.004 (-0.02, 0.03)        | 0.004 (-0.02, 0.03)     | -0.01 (-0.04, 0.03)  | -0.01 (-0.05, 0.02)     |
| GM                  | 0.2 (-0.1, 0.4)            | 0.3** (0.04, 0.5)       | -0.2* (-0.5, 0.04)   | -0.3*** (-0.6, -0.1)    |
| WM                  | 0.2 (-0.1, 0.4)            | 0.5*** (0.1, 0.8)       | -0.3** (-0.5, -0.01) | -0.1 (-0.4, 0.2)        |
| a-tDCS              | 0.3 (-0.5, 1.0)            | 0.2 (-0.5, 0.8)         | 0.4 (-0.5, 1.2)      | 0.3 (-0.6, 1.1)         |
| EI                  | 0.3 (-0.9, 1.5)            |                         | -1.3** (-2.4, -0.2)  |                         |
| GABA                |                            | -2.6 (-6.5, 1.3)        |                      | 4.9*** (1.9, 7.8)       |
| Glx                 |                            | 0.8 (-1.0, 2.6)         |                      | 0.4 (-1.2, 1.9)         |
| Trial:a-tDCS        | -0.001 (-0.02, 0.02)       | -0.002 (-0.02, 0.02)    | -0.002 (-0.02, 0.01) | -0.003 (-0.02, 0.01)    |
| Trial:EI            | -0.01 (-0.03, 0.02)        |                         | 0.005 (-0.03, 0.04)  |                         |
| Trial:GABA          |                            | 0.01 (-0.1, 0.1)        |                      | -0.004 (-0.1, 0.1)      |
| Trial:Glx           |                            | -0.000 (-0.03, 0.03)    |                      | 0.01 (-0.03, 0.05)      |
| a-tDCS:EI           | -0.4 (-1.1, 0.3)           |                         | 0.4 (-0.4, 1.1)      |                         |
| a-tDCS:GABA         |                            | 2.6** (0.5, 4.7)        |                      | -0.6 (-3.2, 1.9)        |
| a-tDCS:Glx          |                            | 0.5 (-0.2, 1.3)         |                      | 0.5 (-0.4, 1.5)         |
| Trial:a-tDCS:EI     | -0.005 (-0.02, 0.01)       |                         | 0.005 (-0.01, 0.02)  |                         |
| Trial:a-tDCS:GABA   |                            | 0.03 (-0.03, 0.1)       |                      | -0.000 (-0.05, 0.05)    |
| Trial:a-tDCS:Glx    |                            | 0.01 (-0.01, 0.03)      |                      | 0.01 (-0.01, 0.03)      |
| Observations        | 1,080                      | 1,080                   | 1,080                | 1,080                   |
| Bayesian Inf. Crit. | 3,639.9                    | 3,661.8                 | 4,148.1              | 4,170.5                 |

Note:

\*p<0.1; \*\*p<0.05; \*\*\*p<0.01

Table S10: **Experiment 2: Association between a-tDCS, V1 neurochemistry, and adaptation memory.** All linear mixed-effect models use the normalised pointing error (at 10-min or 24-hours post-PA) as the dependent variable. Model (1) assesses the modulation influence of left M1 E:I (Glx:GABA) on the behavioural effect of a-tDCS on the AE at 10-minutes. Model (2) decomposes the individual interaction of GABA and Glx with the behavioural effect of a-tDCS effect on short-term retention. Models (4) and (5) assess the same effects at the long-term retention time point (24-hours). There was no significant interaction between a-tDCS and E:I at any of the two retention time points. All models also controlled for the fraction of grey and white matter within the voxel. \*p<0.1; \*\*p<0.05; \*\*\*p<0.01 (all two-tailed).
